# Supplementary material for: Vascular dimorphism ensured by regulated proteoglycan dynamics favors rapid umbilical artery closure at birth
Source: bioRxiv preprint, doi:10.1101/2020.07.02.184978, version 1 (2020-07-03)
Supplement: Online microarray data supplement- umbilical artery versus vein [file 184978_file06.xlsx]

## Sheet: Sheet1
#%result_name=NCS_U219
#%array_type=HG-U219
#%annotation=HG-U219.na36.annot.csv
#%comparison=Artery vs Vein
ID	Artery Avg (log2)	Vein Avg (log2)	Fold Change	P-val	FDR P-val	Gene Symbol	Description
11758382_s_at	6.18	7	-1.77	0.0206	0.199	ABCC9	ATP binding cassette subfamily C member 9
11743675_x_at	4.81	4	1.75	0.0005	0.0176	ABL2	ABL proto-oncogene 2, non-receptor tyrosine kinase
11741077_x_at	5.43	4.81	1.54	0.0001	0.0061	ABR	active BCR-related
11758096_s_at	6.68	6	1.61	0.0002	0.0084	ABR	active BCR-related
11725358_a_at	4.46	2.85	3.06	8.79e-12	6.58e-09	ACAN	aggrecan
11746009_a_at	4.93	4.34	1.5	0.0011	0.0305	ACAT2	acetyl-CoA acetyltransferase 2
11741285_a_at	1.72	2.68	-1.94	1.17e-05	0.0009	ACKR4	atypical chemokine receptor 4
11741286_a_at	1.58	2.19	-1.52	0.0004	0.0135	ACKR4	atypical chemokine receptor 4
11743109_x_at	8.02	6.63	2.62	1.3e-09	4.69e-07	ACTA1	actin, alpha 1, skeletal muscle
11743108_a_at	7.14	5.81	2.52	4.07e-07	5.45e-05	ACTA1	actin, alpha 1, skeletal muscle
11753504_x_at	7.56	6.42	2.19	2.44e-06	0.0002	ACTA1	actin, alpha 1, skeletal muscle
11721573_a_at	5.24	3.3	3.84	2.09e-07	3.19e-05	ACVRL1	activin A receptor type IL
11747260_a_at	4.22	2.74	2.8	8.81e-07	0.0001	ACVRL1	activin A receptor type IL
11719513_a_at	4.9	4.25	1.57	0.0018	0.0433	ADAM15	ADAM metallopeptidase domain 15
11754662_s_at	7.85	8.79	-1.92	3.4e-10	1.5e-07	ADAMTS1	ADAM metallopeptidase with thrombospondin type 1 motif 1
11732158_a_at	5.06	5.65	-1.5	0.0015	0.0383	ADAMTS1	ADAM metallopeptidase with thrombospondin type 1 motif 1
11730923_x_at	3.6	4.27	-1.59	0.0002	0.0081	ADAMTS4	ADAM metallopeptidase with thrombospondin type 1 motif 4
11725175_x_at	3.42	4.27	-1.81	1.82e-07	2.83e-05	ADAP2	ArfGAP with dual PH domains 2
11755003_a_at	6.92	5.98	1.91	0.0344	0.2633	ADCY4	adenylate cyclase 4
11757448_s_at	5.7	5.08	1.54	6.26e-06	0.0006	ADD3	adducin 3 (gamma)
11717348_a_at	3.36	2.77	1.51	0.0003	0.0116	ADD3	adducin 3 (gamma)
11742860_a_at	3.96	3.27	1.62	0.0001	0.0059	ADGRF5	adhesion G protein-coupled receptor F5
11742862_a_at	5.31	4.2	2.15	0.0002	0.0086	ADGRF5	adhesion G protein-coupled receptor F5
11741561_a_at	5.53	4.61	1.89	0.0008	0.0246	ADGRF5	adhesion G protein-coupled receptor F5
11742861_x_at	4.48	3.38	2.14	0.0009	0.0253	ADGRF5	adhesion G protein-coupled receptor F5
11716395_a_at	3.33	2.73	1.52	0.0007	0.0212	ADGRG1	adhesion G protein-coupled receptor G1
11725191_s_at	8.11	5.99	4.36	4.09e-08	8.14e-06	ADGRG6	adhesion G protein-coupled receptor G6
11725190_a_at	7.46	5.31	4.44	7.08e-08	1.29e-05	ADGRG6	adhesion G protein-coupled receptor G6
11729550_a_at	7.75	5.58	4.49	2.03e-07	3.11e-05	ADGRG6	adhesion G protein-coupled receptor G6
11725188_a_at	3.05	2.05	1.99	1.33e-06	0.0001	ADGRG6	adhesion G protein-coupled receptor G6
11725189_x_at	2.34	1.72	1.54	2.06e-06	0.0002	ADGRG6	adhesion G protein-coupled receptor G6
11729549_s_at	2.83	2.16	1.59	0.0001	0.0051	ADGRG6	adhesion G protein-coupled receptor G6
11745273_a_at	3.08	3.72	-1.56	7.03e-06	0.0006	ADGRL2	adhesion G protein-coupled receptor L2
11727005_at	6.81	4.26	5.84	9.32e-10	3.46e-07	ADGRL4	adhesion G protein-coupled receptor L4
11758653_s_at	4.65	2.5	4.46	1.84e-09	6.39e-07	ADGRL4	adhesion G protein-coupled receptor L4
11746898_x_at	2.73	1.91	1.78	6.28e-05	0.0035	ADH1B	alcohol dehydrogenase 1B (class I), beta polypeptide
11722995_at	2.62	1.96	1.59	0.0001	0.0068	ADH1B	alcohol dehydrogenase 1B (class I), beta polypeptide
11746322_x_at	2.97	2.38	1.51	0.0003	0.0128	ADH1B	alcohol dehydrogenase 1B (class I), beta polypeptide
11717305_a_at	8.51	7.88	1.54	0.0048	0.082	ADIRF	adipogenesis regulatory factor
11717306_x_at	7.98	7.35	1.54	0.0082	0.1154	ADIRF	adipogenesis regulatory factor
11756406_x_at	4.6	2.88	3.28	1.46e-11	1.03e-08	ADM	adrenomedullin
11716710_a_at	5.06	3.16	3.74	5.39e-09	1.53e-06	ADM	adrenomedullin
11754888_a_at	6.16	4.56	3.03	2.29e-18	2.97e-14	ADSSL1	adenylosuccinate synthase like 1
11754098_a_at	4.02	3.39	1.54	0.0007	0.0225	AGO2	argonaute RISC catalytic component 2
11730753_at	3.35	2.75	1.51	0.0016	0.039	AGPAT5	1-acylglycerol-3-phosphate O-acyltransferase 5
11730726_s_at	4.19	3.16	2.04	3.79e-05	0.0023	AGT	angiotensinogen (serpin peptidase inhibitor, clade A, member 8)
11717131_a_at	4.71	2.82	3.71	2.31e-11	1.52e-08	AHNAK2	AHNAK nucleoprotein 2
11746228_a_at	3.8	2.44	2.56	8.91e-11	5e-08	AHNAK2	AHNAK nucleoprotein 2
11717132_s_at	6.36	4.91	2.73	4.8e-10	2.01e-07	AHNAK2	AHNAK nucleoprotein 2
11731019_x_at	5	5.86	-1.82	0.0002	0.0092	AIF1	allograft inflammatory factor 1
11754966_a_at	8.13	7.4	1.65	4.71e-06	0.0004	AIF1L	allograft inflammatory factor 1-like
11726013_a_at	4.42	3.74	1.61	3.55e-07	4.86e-05	AJUBA	ajuba LIM protein
11715711_a_at	4.23	2.53	3.25	1.02e-09	3.76e-07	AKR1C3	aldo-keto reductase family 1, member C3
11716397_a_at	5.61	4.96	1.57	0.0042	0.0754	AKR7A2	aldo-keto reductase family 7, member A2
11724232_s_at	1.82	3.28	-2.75	2.1e-08	4.83e-06	ALDH1A2	aldehyde dehydrogenase 1 family, member A2
11733097_x_at	9.63	8.96	1.59	9.47e-05	0.0048	ALDOA	aldolase A, fructose-bisphosphate
11745964_x_at	8.6	7.78	1.77	0.0012	0.0328	ALDOA	aldolase A, fructose-bisphosphate
11747079_x_at	5.12	4.2	1.9	2.91e-14	5.74e-11	ALDOC	aldolase C, fructose-bisphosphate
11723399_at	6.82	7.53	-1.64	1.63e-05	0.0012	ALPK2	alpha kinase 2
11741298_a_at	3.38	2.2	2.28	5.92e-11	3.56e-08	AMER2	APC membrane recruitment protein 2
11759326_at	4.69	2.76	3.81	2.02e-10	9.9e-08	AMER2	APC membrane recruitment protein 2
11739921_a_at	3.33	2.54	1.73	3.34e-05	0.0021	AMER2	APC membrane recruitment protein 2
11724473_a_at	3.96	3.15	1.76	5.97e-10	2.44e-07	AMPH	amphiphysin
11726693_s_at	6.04	5.19	1.8	1.18e-08	3.1e-06	ANGPT1	angiopoietin 1
11726692_at	5.35	4.71	1.56	8.12e-05	0.0043	ANGPT1	angiopoietin 1
11716630_a_at	4.39	3.49	1.87	5.17e-05	0.003	ANGPTL4	angiopoietin like 4
11721206_x_at	4.26	3.65	1.53	2.71e-06	0.0003	ANK3	ankyrin 3, node of Ranvier (ankyrin G)
11731445_at	3.29	2.13	2.24	3.05e-07	4.31e-05	ANKRD1	ankyrin repeat domain 1 (cardiac muscle)
11721917_a_at	7.82	5.5	5	2.27e-16	9.79e-13	ANKRD37	ankyrin repeat domain 37
11760650_a_at	3.71	2.12	3	2.2e-10	1.06e-07	ANKRD37	ankyrin repeat domain 37
11726396_x_at	6.1	5.08	2.02	8.23e-09	2.24e-06	ANOS1	anosmin 1
11758166_s_at	7.25	6.19	2.09	5.32e-06	0.0005	ANOS1	anosmin 1
11717127_a_at	2.61	3.21	-1.51	0.0014	0.0349	ANPEP	alanyl (membrane) aminopeptidase
11726830_at	5.31	6.04	-1.66	0.0005	0.0183	ANTXR1	anthrax toxin receptor 1
11727629_at	3.41	2.63	1.71	4.95e-07	6.39e-05	APBA2	amyloid beta (A4) precursor protein-binding, family A, member 2
11727630_s_at	3.34	2.66	1.6	2.92e-05	0.0019	APBA2	amyloid beta (A4) precursor protein-binding, family A, member 2
11734823_a_at	4.62	3.97	1.57	0.0006	0.0199	APBB2	amyloid beta (A4) precursor protein-binding, family B, member 2
11734821_at	5.59	4.96	1.56	0.0026	0.0544	APBB2	amyloid beta (A4) precursor protein-binding, family B, member 2
11730424_at	6.06	4.77	2.46	4.44e-13	5.35e-10	APCDD1L	adenomatosis polyposis coli down-regulated 1-like
11742449_a_at	3.81	3.06	1.68	0.0006	0.0203	APOL1	apolipoprotein L1
11723975_x_at	4.24	3.11	2.2	2.5e-07	3.66e-05	APOL3	apolipoprotein L, 3
11723974_a_at	3.53	2.62	1.89	0.0005	0.0183	APOL3	apolipoprotein L, 3
11747177_x_at	5.51	3.07	5.43	6.66e-12	5.22e-09	AQP1	aquaporin 1 (Colton blood group)
11715942_a_at	8.9	6.89	4.02	1.19e-09	4.33e-07	AQP1	aquaporin 1 (Colton blood group)
11715941_s_at	4.51	2.8	3.26	1.81e-08	4.26e-06	AQP1	aquaporin 1 (Colton blood group)
11744449_a_at	3.89	3.29	1.52	0.0002	0.0078	ARHGAP4	Rho GTPase activating protein 4
11722876_at	4.48	3.36	2.17	9.94e-06	0.0008	ARHGEF15	Rho guanine nucleotide exchange factor 15
11763593_a_at	2.88	2.21	1.59	0.0002	0.0075	ARHGEF28	Rho guanine nucleotide exchange factor 28
11759746_a_at	2.97	2.1	1.83	0.0002	0.008	ARHGEF28	Rho guanine nucleotide exchange factor 28
11755923_x_at	2.63	1.98	1.57	0.0006	0.0198	ARHGEF28	Rho guanine nucleotide exchange factor 28
11721645_x_at	5.3	4.71	1.5	0.0006	0.0192	ARL1	ADP-ribosylation factor like GTPase 1
11716707_a_at	4.61	3.93	1.6	0.0021	0.0473	ARL2BP	ADP-ribosylation factor like GTPase 2 binding protein
11732331_s_at	5.24	3.89	2.55	2.82e-06	0.0003	ARL4C	ADP-ribosylation factor like GTPase 4C
11754313_s_at	4.44	3.76	1.61	0.0026	0.0551	ARL4C	ADP-ribosylation factor like GTPase 4C
11720466_a_at	3.64	2.87	1.71	0.0003	0.0118	ARL6IP1	ADP-ribosylation factor like GTPase 6 interacting protein 1
11763683_a_at	4.64	3.91	1.66	0.0009	0.0263	ARL6IP4	ADP-ribosylation factor like GTPase 6 interacting protein 4
11731654_at	3.12	2.43	1.61	9.13e-07	0.0001	ARL15	ADP-ribosylation factor like GTPase 15
11744077_at	6.01	5.37	1.56	0.01	0.1303	ARPC1B	actin related protein 2/3 complex subunit 1B
11725923_s_at	6.04	5.21	1.77	0.0006	0.0189	ASAP2	ArfGAP with SH3 domain, ankyrin repeat and PH domain 2
11719344_a_at	5.83	7.74	-3.75	5.64e-11	3.44e-08	ATF3	activating transcription factor 3
11753632_x_at	2.53	3.16	-1.55	0.0001	0.0066	ATF3	activating transcription factor 3
11717018_a_at	6.61	6.01	1.52	1.27e-05	0.001	ATP1A1	ATPase, Na+/K+ transporting, alpha 1 polypeptide
11754930_x_at	5.98	5.17	1.75	0.0003	0.0107	ATP1A1	ATPase, Na+/K+ transporting, alpha 1 polypeptide
11747228_x_at	6.33	5.66	1.6	0.0004	0.0143	ATP1A1	ATPase, Na+/K+ transporting, alpha 1 polypeptide
11717019_x_at	7.27	6.56	1.64	0.0009	0.0266	ATP1A1	ATPase, Na+/K+ transporting, alpha 1 polypeptide
11729419_a_at	6.09	5.5	1.51	7.26e-05	0.0039	ATP2A3	ATPase, Ca++ transporting, ubiquitous
11753329_x_at	6.14	5.46	1.6	0.0003	0.0104	ATP5A1	ATP synthase, H+ transporting, mitochondrial F1 complex, alpha subunit 1, cardiac muscle
11753328_a_at	4.96	4.12	1.78	0.0004	0.0141	ATP5A1	ATP synthase, H+ transporting, mitochondrial F1 complex, alpha subunit 1, cardiac muscle
11749258_a_at	5.02	4.28	1.68	0.0015	0.0378	ATP6AP1	ATPase, H+ transporting, lysosomal accessory protein 1
11754958_s_at	5.94	5.28	1.58	0.0213	0.2029	ATP6AP1	ATPase, H+ transporting, lysosomal accessory protein 1
11720313_a_at	5.36	4.74	1.53	0.0038	0.071	ATP6V0B	ATPase, H+ transporting, lysosomal 21kDa, V0 subunit b
11730121_a_at	4.1	4.97	-1.83	2.35e-05	0.0016	ATP8B4	ATPase, class I, type 8B, member 4
11740041_at	4.43	3.59	1.78	2.77e-06	0.0003	ATP10A	ATPase, class V, type 10A
11739432_at	4.63	3.99	1.56	0.0014	0.0351	ATP11B	ATPase, class VI, type 11B
11744609_a_at	5.51	6.13	-1.54	0.0001	0.0054	ATXN7	ataxin 7
11739701_a_at	5.13	4.29	1.79	0.0008	0.0244	B3GNT2	UDP-GlcNAc:betaGal beta-1,3-N-acetylglucosaminyltransferase 2
11756509_a_at	6.86	7.59	-1.66	1.69e-05	0.0012	BAMBI	BMP and activin membrane-bound inhibitor
11720566_at	7.36	6.57	1.72	7.37e-08	1.33e-05	BCAT1	branched chain amino-acid transaminase 1, cytosolic
11746149_x_at	3.62	4.48	-1.81	0.0038	0.0707	BCHE	butyrylcholinesterase
11751833_a_at	4.58	5.25	-1.59	0.0061	0.0961	BCHE	butyrylcholinesterase
11726280_a_at	4.62	3.9	1.64	0.003	0.0605	BCR	breakpoint cluster region
11719475_a_at	3.92	3.3	1.54	0.0004	0.0152	BEX1	brain expressed X-linked 1
11721244_a_at	3.37	2.38	1.99	5.52e-05	0.0032	BGN	biglycan
11721245_s_at	8.33	7.45	1.85	0.0003	0.0124	BGN	biglycan
11721246_x_at	8.48	7.78	1.62	0.001	0.0274	BGN	biglycan
11725983_at	4.98	3.72	2.41	3.98e-07	5.34e-05	BHLHE40	basic helix-loop-helix family, member e40
11724965_at	6.2	6.84	-1.56	1.85e-07	2.87e-05	BLOC1S1-RDH5; RDH5	BLOC1S1-RDH5 readthrough; retinol dehydrogenase 5 (11-cis/9-cis)
11743498_at	2.5	3.65	-2.22	0.0006	0.0199	BMP2	bone morphogenetic protein 2
11750935_a_at	6.15	4.97	2.28	4.26e-06	0.0004	BMP6	bone morphogenetic protein 6
11743948_at	8.31	7.68	1.55	5.87e-05	0.0033	BMP6	bone morphogenetic protein 6
11729824_at	3.01	3.92	-1.88	0.0007	0.0224	BMPER	BMP binding endothelial regulator
11728085_s_at	1.76	2.36	-1.52	3.36e-05	0.0021	BMPR1B	bone morphogenetic protein receptor type IB
11728699_at	7.4	6.33	2.1	2.88e-06	0.0003	BMPR2	bone morphogenetic protein receptor type II
11756105_a_at	8.59	7.88	1.64	0.0041	0.0746	BMPR2	bone morphogenetic protein receptor type II
11729289_a_at	5.08	4.14	1.91	0.0021	0.0474	BMX	BMX non-receptor tyrosine kinase
11727769_at	5.27	6.27	-2.01	3.5e-09	1.08e-06	BNC2	basonuclin 2
11758476_s_at	4.33	5.32	-1.98	3.72e-08	7.57e-06	BNC2	basonuclin 2
11755143_a_at	5.3	5.98	-1.6	4.55e-07	5.96e-05	BNC2	basonuclin 2
11727768_at	4.16	4.85	-1.62	0.0002	0.0079	BNC2	basonuclin 2
11727765_at	3.66	4.31	-1.57	0.0012	0.032	BNC2	basonuclin 2
11743084_s_at	6.87	5.67	2.29	2.21e-12	1.88e-09	BNIP3	BCL2/adenovirus E1B 19kDa interacting protein 3
11716035_at	5.73	3.97	3.39	1.45e-09	5.17e-07	BST2	bone marrow stromal cell antigen 2
11716034_a_at	4.5	3.15	2.54	4.76e-07	6.18e-05	BST2	bone marrow stromal cell antigen 2
11716036_x_at	5.33	3.75	2.98	1.88e-06	0.0002	BST2	bone marrow stromal cell antigen 2
11757933_s_at	7.64	8.6	-1.95	3.36e-08	7.05e-06	BTG2	BTG family, member 2
11715615_at	5.06	6.06	-2.01	0.0015	0.038	BTG2	BTG family, member 2
11755335_a_at	4.5	3.5	2	4.25e-08	8.44e-06	C1orf21	chromosome 1 open reading frame 21
11756892_a_at	4.35	3.71	1.55	7.36e-05	0.004	C2CD2	C2 calcium-dependent domain containing 2
11715393_a_at	4.36	5.54	-2.27	0.0001	0.0063	C3	complement component 3
11721099_at	3.45	4.3	-1.8	0.0178	0.1818	C3AR1	complement component 3a receptor 1
11730175_at	6.9	6.19	1.63	0.0007	0.0226	C4orf3	chromosome 4 open reading frame 3
11755087_a_at	2.92	2.26	1.58	1.07e-05	0.0009	C4orf47	chromosome 4 open reading frame 47
11735867_a_at	8.04	6.07	3.92	8.64e-11	4.91e-08	C5orf46	chromosome 5 open reading frame 46
11717980_x_at	2.37	2.95	-1.5	4.11e-06	0.0004	C7	complement component 7
11717979_at	2.41	3.24	-1.77	1.19e-05	0.0009	C7	complement component 7
11716520_at	7.16	6.09	2.1	1.64e-08	3.99e-06	C10orf10	chromosome 10 open reading frame 10
11751548_a_at	5.29	4.17	2.18	3.89e-07	5.24e-05	C10orf10	chromosome 10 open reading frame 10
11717046_at	5.97	5.34	1.54	1.62e-07	2.56e-05	C11orf95	chromosome 11 open reading frame 95
11717988_s_at	5.91	5.32	1.51	5.19e-05	0.003	C17orf49; RNASEK-C17orf49	chromosome 17 open reading frame 49; RNASEK-C17orf49 readthrough
11730408_a_at	4.2	2.46	3.35	1.3e-12	1.31e-09	C19orf33	chromosome 19 open reading frame 33
11720947_x_at	8.47	7.51	1.95	7.65e-05	0.0041	CA12	carbonic anhydrase XII
11720948_a_at	3.85	3.15	1.62	0.0005	0.0166	CA12	carbonic anhydrase XII
11754856_a_at	8.43	7.58	1.8	0.0006	0.0188	CA12	carbonic anhydrase XII
11720946_at	6.61	5.92	1.61	0.0008	0.0238	CA12	carbonic anhydrase XII
11747993_a_at	4.19	3.15	2.07	0.0002	0.0097	CALCRL	calcitonin receptor like receptor
11730274_at	5.76	4.6	2.24	0.0026	0.0551	CALCRL	calcitonin receptor like receptor
11730275_at	4.91	3.58	2.51	0.0098	0.1288	CALCRL	calcitonin receptor like receptor
11721581_at	8.54	9.61	-2.1	2.84e-07	4.07e-05	CAMKK1	calcium/calmodulin-dependent protein kinase kinase 1, alpha
11751361_a_at	4.44	3.52	1.89	8.03e-06	0.0007	CASQ2	calsequestrin 2 (cardiac muscle)
11723223_at	8.86	8.26	1.52	0.0007	0.0219	CASQ2	calsequestrin 2 (cardiac muscle)
11734581_a_at	6.38	2.36	16.17	3.81e-14	6.71e-11	CBLN2	cerebellin 2 precursor
11734582_a_at	2.58	1.74	1.8	3.69e-08	7.53e-06	CBLN2	cerebellin 2 precursor
11744286_s_at	4.91	3.44	2.78	2.52e-10	1.19e-07	CBS; CBSL	cystathionine-beta-synthase; cystathionine-beta-synthase like
11744835_s_at	4.8	3.31	2.81	5.85e-08	1.08e-05	CBS; CBSL	cystathionine-beta-synthase; cystathionine-beta-synthase like
11716932_a_at	5.46	4.41	2.07	1.78e-05	0.0013	CCDC80	coiled-coil domain containing 80
11748618_a_at	5.28	4.46	1.77	6.31e-05	0.0035	CCDC80	coiled-coil domain containing 80
11716933_a_at	4.7	3.91	1.73	0.0002	0.0091	CCDC80	coiled-coil domain containing 80
11716934_a_at	6.1	5.42	1.61	0.0005	0.0181	CCDC80	coiled-coil domain containing 80
11751791_a_at	5.92	5.19	1.66	0.0012	0.0328	CCDC80	coiled-coil domain containing 80
11721483_at	4.17	3.5	1.6	0.0003	0.0115	CCDC85B	coiled-coil domain containing 85B
11738200_a_at	5.64	3.12	5.73	1.14e-13	1.65e-10	CCDC102B	coiled-coil domain containing 102B
11753537_a_at	4.91	3.31	3.04	6.26e-13	7.02e-10	CCDC102B	coiled-coil domain containing 102B
11744508_a_at	5.13	6.1	-1.96	2.26e-09	7.66e-07	CCDC146	coiled-coil domain containing 146
11720994_x_at	2.7	4.03	-2.5	2.25e-07	3.34e-05	CCL3	chemokine (C-C motif) ligand 3
11755564_x_at	3.17	4	-1.78	1.1e-05	0.0009	CCL3L1; CCL3L3	chemokine (C-C motif) ligand 3-like 1; chemokine (C-C motif) ligand 3-like 3
11718982_s_at	4.31	6.7	-5.24	7.42e-10	2.84e-07	CCL4; CCL4L1; CCL4L2	chemokine (C-C motif) ligand 4; chemokine (C-C motif) ligand 4-like 1; chemokine (C-C motif) ligand 4-like 2
11746954_s_at	3.42	4.61	-2.28	4.53e-08	8.89e-06	CCL4; CCL4L1; CCL4L2	chemokine (C-C motif) ligand 4; chemokine (C-C motif) ligand 4-like 1; chemokine (C-C motif) ligand 4-like 2
11718983_x_at	2.5	4.23	-3.33	3.9e-07	5.24e-05	CCL4; CCL4L1; CCL4L2	chemokine (C-C motif) ligand 4; chemokine (C-C motif) ligand 4-like 1; chemokine (C-C motif) ligand 4-like 2
11744660_s_at	2.92	4.07	-2.21	5.07e-08	9.61e-06	CCL4L1; CCL4L2	chemokine (C-C motif) ligand 4-like 1; chemokine (C-C motif) ligand 4-like 2
11728039_s_at	2.76	3.76	-2.01	8.88e-07	0.0001	CCL8	chemokine (C-C motif) ligand 8
11720251_at	3.63	2.84	1.74	0.0313	0.2511	CCL18	chemokine (C-C motif) ligand 18
11721256_a_at	3.58	2	2.98	6.25e-14	9.95e-11	CCND1	cyclin D1
11721255_at	3.79	2.49	2.47	1.18e-10	6.34e-08	CCND1	cyclin D1
11741519_s_at	5.15	6.05	-1.86	0.014	0.1588	CD14	CD14 molecule
11718658_s_at	5.52	3.31	4.64	9.95e-08	1.74e-05	CD34	CD34 molecule
11742282_a_at	4.42	3	2.67	7.59e-07	9.22e-05	CD40	CD40 molecule, TNF receptor superfamily member 5
11728701_a_at	5.2	3.43	3.43	1.18e-08	3.1e-06	CD55	CD55 molecule, decay accelerating factor for complement (Cromer blood group)
11762060_x_at	5.24	3.93	2.49	2.72e-08	5.91e-06	CD55	CD55 molecule, decay accelerating factor for complement (Cromer blood group)
11752832_x_at	5.22	3.89	2.52	5.14e-08	9.7e-06	CD55	CD55 molecule, decay accelerating factor for complement (Cromer blood group)
11755084_x_at	5.12	3.73	2.61	7.15e-07	8.77e-05	CD55	CD55 molecule, decay accelerating factor for complement (Cromer blood group)
11746180_a_at	5.8	4.41	2.63	4.42e-06	0.0004	CD55	CD55 molecule, decay accelerating factor for complement (Cromer blood group)
11762726_x_at	4.53	3.69	1.79	4.18e-05	0.0025	CD55	CD55 molecule, decay accelerating factor for complement (Cromer blood group)
11738435_x_at	4.47	5.23	-1.7	0.0003	0.0107	CD74	CD74 molecule, major histocompatibility complex, class II invariant chain
11726255_x_at	5.61	6.49	-1.84	0.0003	0.013	CD74	CD74 molecule, major histocompatibility complex, class II invariant chain
11726254_s_at	5.56	6.34	-1.72	0.0004	0.0151	CD74	CD74 molecule, major histocompatibility complex, class II invariant chain
11756766_x_at	4.99	5.81	-1.76	0.0004	0.0158	CD74	CD74 molecule, major histocompatibility complex, class II invariant chain
11718320_at	7.34	6.7	1.55	0.0037	0.0692	CD93	CD93 molecule
11718319_at	6.71	6.07	1.56	0.0228	0.2114	CD93	CD93 molecule
11745958_a_at	6.78	5.92	1.82	3.01e-05	0.0019	CD99	CD99 molecule
11717658_at	6.16	4.92	2.36	0.0004	0.0147	CD109	CD109 molecule
11757625_s_at	7.42	8.06	-1.56	0.0025	0.0533	CD200	CD200 molecule
11716906_a_at	2.09	2.72	-1.56	0.0271	0.2327	CDH1	cadherin 1, type 1
11721651_at	6.29	4.59	3.24	7.67e-05	0.0041	CDH5	cadherin 5, type 2 (vascular endothelium)
11742867_at	3.52	2.77	1.67	0.0004	0.0138	CDH6	cadherin 6, type 2, K-cadherin (fetal kidney)
11752562_x_at	4.99	3.18	3.5	3.61e-09	1.1e-06	CDH13	cadherin 13
11752561_a_at	5.56	3.87	3.23	1.59e-08	3.95e-06	CDH13	cadherin 13
11746591_a_at	5.08	3.78	2.46	4.65e-08	9.09e-06	CDH13	cadherin 13
11729580_s_at	6.06	4.34	3.28	1.23e-07	2.07e-05	CDH13	cadherin 13
11729579_at	8.1	6.75	2.55	7.13e-07	8.75e-05	CDH13	cadherin 13
11734425_a_at	2.22	5.77	-11.71	5.67e-16	2e-12	CDH23	cadherin-related 23
11734426_x_at	2.76	5.3	-5.82	2.09e-12	1.81e-09	CDH23	cadherin-related 23
11747109_a_at	2.48	3.13	-1.56	0.0011	0.0308	CDH23	cadherin-related 23
11753378_a_at	4.43	3.64	1.73	0.0004	0.0154	CDK4	cyclin-dependent kinase 4
11750512_x_at	5.55	4.92	1.54	0.0037	0.0694	CDK4	cyclin-dependent kinase 4
11729118_a_at	5.84	5.16	1.6	1.71e-05	0.0013	CDKN1C	cyclin-dependent kinase inhibitor 1C (p57, Kip2)
11763717_a_at	7.54	6.92	1.53	0.0021	0.0476	CDKN1C	cyclin-dependent kinase inhibitor 1C (p57, Kip2)
11763718_x_at	7.6	7.01	1.5	0.0022	0.049	CDKN1C	cyclin-dependent kinase inhibitor 1C (p57, Kip2)
11723465_a_at	4.83	5.56	-1.65	4.05e-06	0.0004	CELF2	CUGBP, Elav-like family member 2
11723464_s_at	4.82	5.5	-1.61	2.88e-05	0.0019	CELF2	CUGBP, Elav-like family member 2
11744789_a_at	2.95	2.33	1.54	0.0005	0.0168	CENPU	centromere protein U
11744724_a_at	4.17	3.35	1.77	0.0003	0.0115	CERS2	ceramide synthase 2
11754581_s_at	6.46	5.69	1.7	8.22e-05	0.0043	CERS6	ceramide synthase 6
11743847_x_at	6.14	5.1	2.05	1.15e-05	0.0009	CFH	complement factor H
11734578_a_at	5.48	4.18	2.47	0.0004	0.0151	CFH	complement factor H
11743846_s_at	6.54	5.27	2.41	1.85e-05	0.0013	CFH; CFHR1	complement factor H; complement factor H-related 1
11757990_s_at	7.2	6.36	1.79	0.0003	0.0108	CFH; CFHR1	complement factor H; complement factor H-related 1
11718481_s_at	4.28	3.4	1.85	0.0004	0.0156	CFI	complement factor I
11720016_at	5.82	5.22	1.51	3.21e-05	0.002	CGNL1	cingulin-like 1
11741135_s_at	4.87	5.5	-1.54	0.0281	0.2369	CHN1	chimerin 1
11757516_s_at	2	2.62	-1.54	3.37e-08	7.05e-06	CHN2; LOC101928168	chimerin 2; uncharacterized LOC101928168
11757950_s_at	6.88	6.28	1.52	0.0064	0.099	CHSY1	chondroitin sulfate synthase 1
11732736_at	3.9	3.29	1.52	0.0265	0.2297	CHSY3	chondroitin sulfate synthase 3
11733299_a_at	4.78	3.36	2.67	1.84e-12	1.62e-09	CLDN5	claudin 5
11743696_at	4.81	3.02	3.45	3.15e-07	4.4e-05	CLEC14A	C-type lectin domain family 14, member A
11757562_s_at	2.99	2.21	1.72	0.0002	0.0085	CLEC18A; CLEC18B; CLEC18C	C-type lectin domain family 18, member A; C-type lectin domain family 18, member B; C-type lectin domain family 18, member C
11717160_a_at	7.37	6.73	1.56	0.0004	0.014	CLTA	clathrin, light chain A
11753530_a_at	6.19	5.41	1.71	0.0007	0.022	CLTA	clathrin, light chain A
11753398_a_at	6.44	5.67	1.71	0.0013	0.0338	CLTA	clathrin, light chain A
11756547_a_at	7.23	8.15	-1.9	0.0085	0.1183	CLU	clusterin
11738807_s_at	6.73	6.03	1.62	0.0008	0.023	CMIP	c-Maf inducing protein
11726437_a_at	3.21	2.52	1.61	3.5e-06	0.0003	CMTM8	CKLF-like MARVEL transmembrane domain containing 8
11722929_a_at	5.14	6.08	-1.92	0.0007	0.0206	CNKSR3	CNKSR family member 3
11731174_s_at	3.06	2.07	1.99	2.43e-07	3.58e-05	CNNM2	cyclin and CBS domain divalent metal cation transport mediator 2
11742193_a_at	2.67	1.82	1.81	0.0002	0.0072	CNR1	cannabinoid receptor 1 (brain)
11730072_at	3.89	2.56	2.52	1.93e-10	9.55e-08	CNTN3	contactin 3 (plasmacytoma associated)
11730073_at	3.16	1.93	2.34	7.89e-10	2.98e-07	CNTN3	contactin 3 (plasmacytoma associated)
11729021_a_at	4.47	5.81	-2.54	8.19e-07	9.87e-05	CNTN4	contactin 4
11715351_at	9.19	8.44	1.68	0.0016	0.0391	COL1A1	collagen, type I, alpha 1
11746872_a_at	6.09	5.32	1.71	0.0022	0.0494	COL1A1	collagen, type I, alpha 1
11715350_a_at	9	8.38	1.53	0.0036	0.0677	COL1A1	collagen, type I, alpha 1
11715352_x_at	8.69	8.05	1.55	0.0064	0.0986	COL1A1	collagen, type I, alpha 1
11751893_a_at	3.87	2.94	1.91	1.33e-05	0.001	COL4A6	collagen, type IV, alpha 6
11751887_a_at	4.38	3.41	1.96	6.38e-05	0.0035	COL4A6	collagen, type IV, alpha 6
11717273_at	6.8	6.14	1.57	0.0003	0.0115	COL5A1	collagen, type V, alpha 1
11739135_s_at	9.04	8.36	1.6	0.0011	0.0304	COL5A2	collagen, type V, alpha 2
11723419_a_at	3.42	2.79	1.55	0.0003	0.0131	COL9A3	collagen, type IX, alpha 3
11751904_x_at	4.88	3.56	2.5	4.05e-05	0.0025	COL11A1	collagen, type XI, alpha 1
11751903_s_at	3.53	2.87	1.59	9.17e-05	0.0047	COL11A1	collagen, type XI, alpha 1
11733706_s_at	5.81	4.91	1.87	0.0004	0.0151	COL11A1	collagen, type XI, alpha 1
11725766_x_at	5.18	4	2.26	0.0057	0.0923	COL11A1	collagen, type XI, alpha 1
11757018_a_at	8.49	9.1	-1.52	0.0337	0.2607	COL12A1	collagen, type XII, alpha 1
11742450_a_at	7.13	6.17	1.95	2.22e-07	3.31e-05	COL13A1	collagen, type XIII, alpha 1
11730534_x_at	7.42	6.23	2.27	2.92e-07	4.16e-05	COL13A1	collagen, type XIII, alpha 1
11730533_a_at	7.6	6.37	2.35	3.55e-06	0.0003	COL13A1	collagen, type XIII, alpha 1
11750544_a_at	6.37	5.66	1.63	0.0003	0.0115	COL13A1	collagen, type XIII, alpha 1
11716281_a_at	9.76	8.85	1.88	3.02e-09	9.57e-07	COL18A1	collagen, type XVIII, alpha 1
11755399_a_at	8.59	7.82	1.71	2.02e-06	0.0002	COL18A1	collagen, type XVIII, alpha 1
11724080_x_at	4.94	4.15	1.73	8.7e-07	0.0001	COL21A1	collagen, type XXI, alpha 1
11748714_a_at	4.06	3.25	1.74	1.02e-05	0.0008	COL21A1	collagen, type XXI, alpha 1
11755816_a_at	3.58	2.88	1.63	1.29e-05	0.001	COL21A1	collagen, type XXI, alpha 1
11725021_at	4.5	3.28	2.33	5.63e-07	7.18e-05	COL23A1	collagen, type XXIII, alpha 1
11720876_s_at	3.56	2.8	1.69	1.22e-05	0.001	CORO2B	coronin, actin binding protein, 2B
11762921_at	10.07	10.73	-1.58	0.0002	0.01	COX3	cytochrome c oxidase III
11754808_s_at	4.58	3.41	2.24	1.55e-10	7.89e-08	CPAMD8	C3 and PZP-like, alpha-2-macroglobulin domain containing 8
11743576_at	8.61	7.12	2.82	5.46e-05	0.0031	CPE	carboxypeptidase E
11743577_s_at	9.56	8.89	1.59	0.0058	0.0931	CPE	carboxypeptidase E
11724951_s_at	7.14	7.8	-1.58	6.96e-06	0.0006	CPEB2	cytoplasmic polyadenylation element binding protein 2
11718008_a_at	4.44	3.5	1.92	2.26e-07	3.35e-05	CPNE2	copine II
11717762_a_at	2.94	3.76	-1.77	3.87e-05	0.0024	CPVL	carboxypeptidase, vitellogenic-like
11719537_a_at	5.49	4.76	1.66	0.0003	0.0129	CPXM2	carboxypeptidase X (M14 family), member 2
11736229_a_at	8.73	7.9	1.78	0.0001	0.0062	CRIM1	cysteine rich transmembrane BMP regulator 1 (chordin-like)
11721704_a_at	6.72	6.07	1.57	0.0063	0.0976	CRIP1	cysteine-rich protein 1 (intestinal)
11723444_a_at	2.33	5.32	-7.97	1.9e-07	2.93e-05	CRTAC1	cartilage acidic protein 1
11760348_at	2.28	2.92	-1.56	0.046	0.3054	CRYAB	crystallin alpha B
11721887_a_at	7.68	8.37	-1.61	9.22e-09	2.49e-06	CRYM	crystallin mu
11716993_a_at	3.5	4.25	-1.68	6.79e-06	0.0006	CSF1R	colony stimulating factor 1 receptor
11722725_a_at	4.93	4.3	1.54	0.0032	0.0632	CSF2RB	colony stimulating factor 2 receptor, beta, low-affinity (granulocyte-macrophage)
11732526_s_at	4.96	4.07	1.85	3.27e-07	4.53e-05	CSGALNACT1	chondroitin sulfate N-acetylgalactosaminyltransferase 1
11727223_a_at	4.88	4.2	1.6	0.0009	0.0263	CSGALNACT1	chondroitin sulfate N-acetylgalactosaminyltransferase 1
11727003_x_at	4.97	4.28	1.61	0.0002	0.0096	CSNK1E; LOC400927-CSNK1E	casein kinase 1, epsilon; LOC400927-CSNK1E readthrough
11757721_s_at	5.86	6.56	-1.62	1.52e-07	2.41e-05	CSRNP1	cysteine-serine-rich nuclear protein 1
11743856_a_at	6.33	4.74	3.01	4.08e-08	8.14e-06	CTHRC1	collagen triple helix repeat containing 1
11748905_a_at	3.46	2.42	2.05	1.55e-06	0.0002	CTHRC1	collagen triple helix repeat containing 1
11744718_a_at	6.59	5.18	2.65	2.04e-05	0.0014	CTHRC1	collagen triple helix repeat containing 1
11749005_a_at	5.24	4.62	1.53	0.0013	0.0337	CTNNA1	catenin (cadherin-associated protein), alpha 1
11756160_x_at	7.35	6.28	2.1	1.75e-08	4.17e-06	CTNNAL1	catenin (cadherin-associated protein), alpha-like 1
11745315_a_at	4.86	3.38	2.79	2.2e-08	5.04e-06	CTNNAL1	catenin (cadherin-associated protein), alpha-like 1
11720494_a_at	7.35	6.43	1.9	2.75e-05	0.0018	CTNNAL1	catenin (cadherin-associated protein), alpha-like 1
11757383_a_at	3.39	4.2	-1.75	2.49e-05	0.0017	CTSH	cathepsin H
11735086_x_at	3.18	2.53	1.57	0.0073	0.1074	CUBN	cubilin (intrinsic factor-cobalamin receptor)
11723048_at	4.19	5.55	-2.56	3.94e-05	0.0024	CX3CR1	chemokine (C-X3-C motif) receptor 1
11718841_s_at	3.86	4.81	-1.93	0.0114	0.1409	CXCL8	chemokine (C-X-C motif) ligand 8
11718744_a_at	5.75	2.18	11.81	4.03e-19	9.95e-15	CXCL12	chemokine (C-X-C motif) ligand 12
11718743_a_at	6.61	2.74	14.69	8.56e-17	4.7e-13	CXCL12	chemokine (C-X-C motif) ligand 12
11720819_s_at	5.78	3.6	4.54	9.9e-07	0.0001	CXCL12	chemokine (C-X-C motif) ligand 12
11720818_a_at	2.89	1.82	2.1	9.01e-06	0.0007	CXCL12	chemokine (C-X-C motif) ligand 12
11753257_a_at	2.57	1.94	1.55	0.0003	0.0113	CXCL12	chemokine (C-X-C motif) ligand 12
11756059_a_at	4.14	2.75	2.62	4.48e-07	5.89e-05	CXCL14	chemokine (C-X-C motif) ligand 14
11717912_s_at	3.27	2.3	1.96	1.5e-06	0.0002	CXCL14	chemokine (C-X-C motif) ligand 14
11728190_s_at	3.33	5.03	-3.25	5.91e-08	1.09e-05	CXCR4	chemokine (C-X-C motif) receptor 4
11728191_x_at	3.36	3.97	-1.53	0.0006	0.0193	CXCR4	chemokine (C-X-C motif) receptor 4
11728189_a_at	2.86	3.92	-2.09	0.0014	0.036	CXCR4	chemokine (C-X-C motif) receptor 4
11757682_a_at	5.3	4.67	1.55	8.76e-06	0.0007	CYB5R2	cytochrome b5 reductase 2
11721693_a_at	5.55	4.44	2.16	1.91e-07	2.94e-05	CYB561	cytochrome b561
11754284_s_at	3.33	2.54	1.73	0.0003	0.0113	CYB561	cytochrome b561
11716309_a_at	5.23	4.58	1.56	0.0017	0.0406	CYBRD1	cytochrome b reductase 1
11720410_s_at	4.29	4.96	-1.6	1.8e-05	0.0013	CYP1B1	cytochrome P450, family 1, subfamily B, polypeptide 1
11720409_s_at	3.82	4.72	-1.86	0.0004	0.0143	CYP1B1	cytochrome P450, family 1, subfamily B, polypeptide 1
11715493_a_at	8.8	9.52	-1.66	9.89e-11	5.43e-08	CYR61	cysteine-rich, angiogenic inducer, 61
11749905_a_at	8.15	8.78	-1.55	1.38e-07	2.26e-05	CYR61	cysteine-rich, angiogenic inducer, 61
11758063_s_at	3.23	2.54	1.62	2.06e-05	0.0014	DCLK2	doublecortin-like kinase 2
11743972_a_at	5.37	4.43	1.92	0.0001	0.0058	DDIT4	DNA damage inducible transcript 4
11744236_a_at	4.47	3.56	1.88	3.87e-05	0.0024	DDX60	DEAD (Asp-Glu-Ala-Asp) box polypeptide 60
11755291_a_at	2.19	2.78	-1.5	0.0002	0.0093	DENND2D	DENN/MADD domain containing 2D
11715460_a_at	4.65	3.06	3	4.57e-11	2.86e-08	DHCR24	24-dehydrocholesterol reductase
11728088_at	6.13	2.56	11.9	5.44e-13	6.25e-10	DKK2	dickkopf WNT signaling pathway inhibitor 2
11728089_a_at	4.29	2.45	3.58	8.06e-11	4.74e-08	DKK2	dickkopf WNT signaling pathway inhibitor 2
11753413_x_at	4.35	3.22	2.18	2.99e-05	0.0019	DLK1	delta-like 1 homolog (Drosophila)
11753397_x_at	4.79	3.91	1.85	3.45e-05	0.0022	DLK1	delta-like 1 homolog (Drosophila)
11744107_x_at	3.64	2.92	1.64	0.0004	0.015	DLK1	delta-like 1 homolog (Drosophila)
11724938_at	2.33	3.78	-2.73	7.44e-07	9.05e-05	DLL1	delta-like 1 (Drosophila)
11753985_x_at	2.8	1.94	1.82	6.46e-10	2.59e-07	DMKN	dermokine
11719333_a_at	2.83	1.99	1.78	1.45e-08	3.65e-06	DMKN	dermokine
11723863_a_at	3.68	4.58	-1.86	0.009	0.1222	DOCK10	dedicator of cytokinesis 10
11724979_a_at	3.44	4.37	-1.91	6.34e-06	0.0006	DPEP2	dipeptidase 2
11719155_a_at	4.29	3.4	1.85	1.22e-06	0.0001	DRAM1	DNA-damage regulated autophagy modulator 1
11725524_s_at	5.01	3.89	2.17	1.35e-07	2.21e-05	DSG2	desmoglein 2
11725523_at	2.55	1.91	1.56	0.0003	0.0122	DSG2	desmoglein 2
11757507_s_at	5.79	2.34	10.86	1.16e-15	3.59e-12	DSP	desmoplakin
11739501_a_at	3.25	2.23	2.03	3.27e-07	4.53e-05	DSP	desmoplakin
11717562_x_at	3.72	2.99	1.66	5.78e-05	0.0033	DTX3L	deltex 3 like, E3 ubiquitin ligase
11743286_at	4.8	3.15	3.14	2.23e-15	6.12e-12	DTX4	deltex 4, E3 ubiquitin ligase
11721695_s_at	2.56	3.8	-2.37	1.4e-11	1e-08	DUSP2	dual specificity phosphatase 2
11717863_a_at	3.51	4.25	-1.67	0.008	0.1141	DUSP5	dual specificity phosphatase 5
11719092_at	4.11	3.17	1.91	7.98e-08	1.42e-05	DUSP26	dual specificity phosphatase 26 (putative)
11745836_x_at	4.4	5.11	-1.64	1.61e-06	0.0002	DYSF	dysferlin
11739461_a_at	3.11	2.38	1.66	1.79e-06	0.0002	ECE1	endothelin converting enzyme 1
11716256_x_at	5.89	5.07	1.77	1.09e-05	0.0009	ECE1	endothelin converting enzyme 1
11745501_s_at	4.94	3.91	2.04	0.0001	0.0053	ECSCR	endothelial cell surface expressed chemotaxis and apoptosis regulator
11724158_s_at	5.24	3.99	2.39	0.0066	0.1009	ECSCR	endothelial cell surface expressed chemotaxis and apoptosis regulator
11724159_x_at	6.93	5.48	2.73	0.007	0.1047	ECSCR	endothelial cell surface expressed chemotaxis and apoptosis regulator
11728640_s_at	7.48	6.84	1.55	0.0025	0.0531	EDARADD; ENO1	EDAR-associated death domain; enolase 1, (alpha)
11726023_a_at	8.71	6.88	3.56	1.48e-05	0.0011	EDN1	endothelin 1
11726024_at	7.98	6.25	3.34	6.76e-05	0.0037	EDN1	endothelin 1
11734459_x_at	4.32	3.51	1.75	0.0021	0.048	EDN3	endothelin 3
11724090_s_at	5.23	4.48	1.68	0.0049	0.0836	EDN3	endothelin 3
11741602_x_at	4.11	3.5	1.53	0.0187	0.187	EDN3	endothelin 3
11747223_a_at	2.13	3.16	-2.05	1.34e-07	2.21e-05	EDNRB	endothelin receptor type B
11758445_s_at	2.81	3.92	-2.15	9.16e-07	0.0001	EDNRB	endothelin receptor type B
11763055_x_at	8.27	7.66	1.52	0.0028	0.0578	EEF1A1	eukaryotic translation elongation factor 1 alpha 1
11753592_x_at	6.92	6.26	1.59	0.0012	0.0323	EEF1G	eukaryotic translation elongation factor 1 gamma
11748764_x_at	7.35	6.62	1.65	0.0003	0.0104	EEF2	eukaryotic translation elongation factor 2
11748763_a_at	6.82	6.06	1.7	0.0063	0.0981	EEF2	eukaryotic translation elongation factor 2
11749564_a_at	8.72	8.08	1.56	0.0102	0.1315	EFEMP1	EGF containing fibulin-like extracellular matrix protein 1
11756809_a_at	2.27	3.52	-2.39	1.33e-09	4.75e-07	EFHC2	EF-hand domain (C-terminal) containing 2
11716341_s_at	4.05	3.11	1.92	4.64e-07	6.05e-05	EFNA1	ephrin-A1
11726351_at	4.35	3.7	1.56	1.07e-06	0.0001	EFNA5	ephrin-A5
11758092_s_at	5.27	4.39	1.85	1.14e-06	0.0001	EFNA5	ephrin-A5
11720404_at	6.01	3.9	4.35	1.38e-10	7.18e-08	EFNB2	ephrin-B2
11720403_at	5.79	3.85	3.85	4.48e-09	1.3e-06	EFNB2	ephrin-B2
11721950_at	3.93	4.66	-1.66	2.34e-05	0.0016	EFR3B	EFR3 homolog B
11744394_x_at	3.93	3.15	1.72	0.0188	0.1875	EGFL7	EGF-like-domain, multiple 7
11757444_a_at	6.22	4.92	2.47	2.91e-12	2.43e-09	EGLN3	egl-9 family hypoxia-inducible factor 3
11733852_at	4.8	3.41	2.61	4.54e-10	1.93e-07	EGLN3	egl-9 family hypoxia-inducible factor 3
11754334_s_at	7.75	9.27	-2.86	3.5e-08	7.27e-06	EGR1	early growth response 1
11752940_a_at	7.08	8.29	-2.31	6.19e-07	7.78e-05	EGR1	early growth response 1
11717860_a_at	7.61	8.9	-2.44	7.85e-06	0.0007	EGR1	early growth response 1
11717862_x_at	6.59	7.81	-2.33	1.79e-05	0.0013	EGR1	early growth response 1
11717861_a_at	5.64	6.63	-1.98	0.0007	0.0216	EGR1	early growth response 1
11751643_x_at	3.44	4.04	-1.52	0.0098	0.1292	EGR1	early growth response 1
11722728_a_at	2.45	3.26	-1.75	1.83e-05	0.0013	EGR2	early growth response 2
11746130_a_at	6.38	5.65	1.66	0.0019	0.0444	EIF3H	eukaryotic translation initiation factor 3, subunit H
11747337_x_at	5.47	4.84	1.55	0.0034	0.0656	EIF3I	eukaryotic translation initiation factor 3, subunit I
11753373_a_at	5.12	4.53	1.51	0.0034	0.0655	EIF3L	eukaryotic translation initiation factor 3, subunit L
11718283_a_at	5.87	5.27	1.52	0.0016	0.0399	EIF4EBP1	eukaryotic translation initiation factor 4E binding protein 1
11725653_a_at	2.09	3.05	-1.94	2.21e-06	0.0002	EMCN	endomucin
11725652_at	2.46	3.08	-1.54	4.74e-05	0.0028	EMCN	endomucin
11723111_a_at	5.73	6.55	-1.77	4.23e-05	0.0025	EMILIN2	elastin microfibril interfacer 2
11717565_s_at	6.48	4.82	3.15	3.14e-08	6.69e-06	EMP1	epithelial membrane protein 1
11717566_at	3.29	2.2	2.14	7.9e-06	0.0007	EMP1	epithelial membrane protein 1
11728708_at	6.73	5.78	1.93	4.68e-10	1.98e-07	EMP2	epithelial membrane protein 2
11728707_a_at	6.89	6.01	1.84	1.29e-05	0.001	EMP2	epithelial membrane protein 2
11728709_a_at	7.22	6.32	1.86	2.53e-05	0.0017	EMP2	epithelial membrane protein 2
11729574_at	5.21	3.72	2.8	1.5e-10	7.74e-08	ENC1	ectodermal-neural cortex 1 (with BTB domain)
11752196_s_at	6.81	5.95	1.82	0.0008	0.0241	ENG	endoglin
11752197_x_at	4.73	4.06	1.59	0.0012	0.0312	ENG	endoglin
11754551_x_at	8.82	8.22	1.51	2.07e-05	0.0014	ENO1	enolase 1, (alpha)
11747799_x_at	8.49	7.9	1.51	2.25e-05	0.0015	ENO1	enolase 1, (alpha)
11743100_a_at	4.84	4.22	1.53	4.35e-07	5.76e-05	ENO2	enolase 2 (gamma, neuronal)
11755602_x_at	4.44	3.85	1.51	0.0015	0.037	ENO3	enolase 3 (beta, muscle)
11758509_s_at	5.02	3.65	2.59	1.88e-06	0.0002	ENPEP	glutamyl aminopeptidase (aminopeptidase A)
11745192_a_at	4.19	3.42	1.71	2.71e-06	0.0003	EPB41L3	erythrocyte membrane protein band 4.1-like 3
11727143_x_at	4.35	3.39	1.94	4.65e-06	0.0004	EPB41L3	erythrocyte membrane protein band 4.1-like 3
11727142_a_at	2.65	2.03	1.53	0.0008	0.0248	EPB41L3	erythrocyte membrane protein band 4.1-like 3
11739072_at	5.6	4.68	1.9	0.0001	0.0056	EPDR1	ependymin related 1
11723441_a_at	3.32	2.19	2.17	2.11e-06	0.0002	EPHA4	EPH receptor A4
11723440_a_at	3.57	2.95	1.54	3.42e-05	0.0021	EPHA4	EPH receptor A4
11717441_a_at	4.8	4.16	1.55	3.02e-06	0.0003	EPS8	epidermal growth factor receptor pathway substrate 8
11729647_s_at	3	1.79	2.31	3.39e-09	1.06e-06	ESM1	endothelial cell-specific molecule 1
11741353_a_at	2.93	2.2	1.66	1.42e-05	0.0011	ESM1	endothelial cell-specific molecule 1
11722300_a_at	7.3	6.37	1.91	3.06e-07	4.31e-05	ETS1	v-ets avian erythroblastosis virus E26 oncogene homolog 1
11744562_x_at	4.14	3.39	1.69	4.52e-07	5.94e-05	EVA1B	eva-1 homolog B (C. elegans)
11720281_a_at	3.38	2.63	1.68	0.0016	0.0398	EVA1C	eva-1 homolog C (C. elegans)
11755900_a_at	7.52	6.92	1.52	6.52e-06	0.0006	EXT1	exostosin glycosyltransferase 1
11723554_at	3.5	5.7	-4.6	6.76e-15	1.59e-11	F5	coagulation factor V (proaccelerin, labile factor)
11723553_at	3.52	5.19	-3.18	1.75e-12	1.57e-09	F5	coagulation factor V (proaccelerin, labile factor)
11758395_s_at	2.32	3.69	-2.58	9.9e-06	0.0008	F5	coagulation factor V (proaccelerin, labile factor)
11755251_x_at	4.79	3.91	1.84	3.79e-07	5.14e-05	FADS1	fatty acid desaturase 1
11745459_a_at	6.1	5.52	1.5	1.16e-06	0.0001	FADS1	fatty acid desaturase 1
11752670_a_at	4.31	3.72	1.51	0.0003	0.013	FADS1	fatty acid desaturase 1
11730603_a_at	4.19	5.39	-2.29	3.88e-09	1.15e-06	FAM13C	family with sequence similarity 13, member C
11726155_s_at	4.06	2.47	3.01	1.67e-11	1.16e-08	FAM19A5	family with sequence similarity 19 (chemokine (C-C motif)-like), member A5
11758614_s_at	3.82	2.06	3.38	5.99e-09	1.68e-06	FAM19A5	family with sequence similarity 19 (chemokine (C-C motif)-like), member A5
11726154_s_at	2.38	1.71	1.59	0.0006	0.0191	FAM19A5	family with sequence similarity 19 (chemokine (C-C motif)-like), member A5
11742961_s_at	7.32	6.71	1.53	8.6e-07	0.0001	FAM43A	family with sequence similarity 43, member A
11759499_at	3.76	4.4	-1.55	8.13e-05	0.0043	FAM49A	family with sequence similarity 49, member A
11726084_a_at	4.64	3.52	2.17	0.0012	0.0321	FAM69B	family with sequence similarity 69, member B
11741413_a_at	2.67	1.99	1.6	0.0005	0.0175	FAM101A; ZNF664-FAM101A	family with sequence similarity 101, member A; filamin-interacting protein FAM101A
11721032_s_at	3.84	3.09	1.68	0.0074	0.1082	FAM107A	family with sequence similarity 107, member A
11726951_s_at	2.94	3.62	-1.6	7.73e-06	0.0007	FAM131B	family with sequence similarity 131, member B
11746927_a_at	3.53	4.45	-1.89	2.76e-09	8.9e-07	FAM155A	family with sequence similarity 155, member A
11730442_s_at	3.45	4.19	-1.67	0.0002	0.0098	FAM155A	family with sequence similarity 155, member A
11736087_at	3.64	2.82	1.77	7.2e-06	0.0006	FAM171A1	family with sequence similarity 171, member A1
11757744_s_at	6.13	5.31	1.77	0.0002	0.0091	FAM171A1	family with sequence similarity 171, member A1
11741222_a_at	3.14	2.54	1.52	5.08e-05	0.003	FAM198B	family with sequence similarity 198, member B
11739379_a_at	6.23	5.57	1.58	0.004	0.0725	FAM198B	family with sequence similarity 198, member B
11755955_a_at	7.33	6.59	1.67	0.0003	0.0108	FAP	fibroblast activation protein alpha
11744195_at	5.2	6.18	-1.97	2.15e-09	7.31e-07	FAT3	FAT atypical cadherin 3
11756236_a_at	5.4	3.97	2.69	1.73e-07	2.71e-05	FBLN1	fibulin 1
11744152_a_at	3.71	3.11	1.52	2.92e-06	0.0003	FBLN1	fibulin 1
11727345_s_at	7.82	6.75	2.09	3.68e-06	0.0004	FBLN1	fibulin 1
11757407_x_at	4.03	3.14	1.85	1.73e-05	0.0013	FBLN1	fibulin 1
11755802_a_at	6.94	5.7	2.35	1.42e-06	0.0002	FBLN2	fibulin 2
11733253_a_at	7.53	6.34	2.28	4.6e-05	0.0027	FBLN2	fibulin 2
11743043_a_at	8.77	8.06	1.64	0.0006	0.0191	FBLN5	fibulin 5
11716486_at	6.03	4.86	2.24	3.13e-08	6.69e-06	FCGBP	Fc fragment of IgG binding protein
11736311_x_at	3.7	4.56	-1.81	0.0002	0.0082	FCGR1A	Fc fragment of IgG, high affinity Ia, receptor (CD64)
11726046_s_at	3.45	2.86	1.51	0.0002	0.0075	FCGR2B	Fc fragment of IgG, low affinity IIb, receptor (CD32)
11741517_s_at	4	3.33	1.59	0.002	0.0462	FCGR2B	Fc fragment of IgG, low affinity IIb, receptor (CD32)
11733005_at	1.86	2.82	-1.94	5.85e-05	0.0033	FCGR3B	Fc fragment of IgG, low affinity IIIb, receptor (CD16b)
11718366_s_at	5.62	5	1.54	0.0013	0.0341	FDPS	farnesyl diphosphate synthase
11727105_s_at	5.66	3.75	3.76	1.17e-07	2e-05	FGD5	FYVE, RhoGEF and PH domain containing 5
11727104_a_at	3.77	2.63	2.21	1.26e-07	2.1e-05	FGD5	FYVE, RhoGEF and PH domain containing 5
11751913_a_at	2.83	2.19	1.56	2.46e-05	0.0017	FGD5	FYVE, RhoGEF and PH domain containing 5
11724317_a_at	5.11	3.93	2.27	3.14e-07	4.39e-05	FGF1	fibroblast growth factor 1 (acidic)
11738195_a_at	3.91	3.1	1.75	3.8e-06	0.0004	FGF1	fibroblast growth factor 1 (acidic)
11735520_a_at	5.03	3.06	3.93	2.31e-05	0.0016	FGF18	fibroblast growth factor 18
11753825_x_at	4.29	3.49	1.75	0.0162	0.1724	FKBP1A; FKBP1C	FK506 binding protein 1A; FK506 binding protein 1C
11727559_at	5.27	4.59	1.59	0.0009	0.0255	FKBP7	FK506 binding protein 7
11753993_x_at	5.46	4.78	1.6	4.65e-05	0.0027	FKBP10	FK506 binding protein 10
11724970_at	2.89	1.94	1.94	4.82e-07	6.25e-05	FLT1	fms-related tyrosine kinase 1
11716826_a_at	5.4	6.05	-1.57	0.0048	0.0822	FMOD	fibromodulin
11739536_x_at	11.22	10.34	1.85	0.0003	0.0109	FN1	fibronectin 1
11745837_x_at	10.55	9.66	1.86	0.0004	0.0142	FN1	fibronectin 1
11739534_a_at	11.28	10.54	1.67	0.0004	0.0143	FN1	fibronectin 1
11749460_x_at	11.18	10.25	1.9	0.0013	0.0343	FN1	fibronectin 1
11739535_s_at	12.22	11.62	1.51	0.0014	0.0357	FN1	fibronectin 1
11723174_a_at	5.96	4.54	2.68	0.0005	0.0167	FNDC1	fibronectin type III domain containing 1
11724555_x_at	2.29	1.66	1.55	2.53e-05	0.0017	FOLH1; FOLH1B	folate hydrolase (prostate-specific membrane antigen) 1; folate hydrolase 1B
11731958_s_at	2.5	1.86	1.56	0.001	0.0284	FOLH1; FOLH1B	folate hydrolase (prostate-specific membrane antigen) 1; folate hydrolase 1B
11734659_a_at	9.23	10.47	-2.35	2.23e-11	1.49e-08	FOS	FBJ murine osteosarcoma viral oncogene homolog
11749291_a_at	8.78	10	-2.34	3.18e-10	1.43e-07	FOS	FBJ murine osteosarcoma viral oncogene homolog
11749852_s_at	6.72	7.88	-2.24	1.61e-08	3.97e-06	FOS	FBJ murine osteosarcoma viral oncogene homolog
11734658_s_at	6.6	7.89	-2.45	2.42e-07	3.57e-05	FOS	FBJ murine osteosarcoma viral oncogene homolog
11717345_a_at	4.6	6.08	-2.8	1.32e-07	2.2e-05	FOSB	FBJ murine osteosarcoma viral oncogene homolog B
11753509_a_at	7.15	6.38	1.7	1.31e-05	0.001	FOXC1	forkhead box C1
11758111_s_at	6.09	5.38	1.63	0.0005	0.0171	FOXC1	forkhead box C1
11715312_at	3.66	3.05	1.52	7.63e-05	0.0041	FOXC2	forkhead box C2
11726956_at	5.2	4.37	1.77	1.8e-06	0.0002	FOXS1	forkhead box S1
11758095_s_at	4.29	5.28	-1.98	1.09e-06	0.0001	FPR1	formyl peptide receptor 1
11725254_a_at	3.08	1.94	2.2	6.55e-14	1.01e-10	FREM1	FRAS1 related extracellular matrix 1
11750746_a_at	4.74	4.08	1.59	0.0005	0.0171	FRMD3	FERM domain containing 3
11724285_at	5.37	4.56	1.75	9.54e-08	1.67e-05	FRMD4A	FERM domain containing 4A
11724284_at	4.07	3.26	1.75	8.96e-06	0.0007	FRMD4A	FERM domain containing 4A
11731573_a_at	4.1	3.43	1.58	0.0016	0.0399	FRMD4B	FERM domain containing 4B
11720326_a_at	3.33	2.04	2.45	1.2e-12	1.23e-09	FRZB	frizzled-related protein
11732712_a_at	4.31	3.42	1.86	2.14e-05	0.0015	FST	follistatin
11752842_a_at	3.83	3.24	1.51	8.87e-05	0.0046	FSTL1	follistatin like 1
11718752_s_at	5.34	4.38	1.94	1.2e-05	0.0009	FUK	fucokinase
11749723_a_at	3.54	2.51	2.03	5.65e-05	0.0032	FUT8	fucosyltransferase 8 (alpha (1,6) fucosyltransferase)
11741568_a_at	4.04	3.44	1.52	0.0007	0.0208	FUT8	fucosyltransferase 8 (alpha (1,6) fucosyltransferase)
11749367_a_at	5.28	4.28	2	2.5e-05	0.0017	FXYD5	FXYD domain containing ion transport regulator 5
11718290_a_at	4.37	3.59	1.72	0.0002	0.0079	FXYD5	FXYD domain containing ion transport regulator 5
11730374_a_at	3.5	4.33	-1.77	3.26e-09	1.02e-06	FYB	FYN binding protein
11730373_a_at	2.54	3.19	-1.57	0.0006	0.0188	FYB	FYN binding protein
11727552_at	5.81	5.04	1.71	6.67e-06	0.0006	FZD2	frizzled class receptor 2
11732561_a_at	3.23	3.87	-1.56	8.75e-07	0.0001	FZD3	frizzled class receptor 3
11722664_a_at	2.25	2.9	-1.57	9.92e-07	0.0001	GABRB3	gamma-aminobutyric acid (GABA) A receptor, beta 3
11722665_a_at	1.84	2.65	-1.75	3.71e-06	0.0004	GABRB3	gamma-aminobutyric acid (GABA) A receptor, beta 3
11724720_a_at	4.24	4.83	-1.5	3.08e-05	0.002	GALNT12	polypeptide N-acetylgalactosaminyltransferase 12
AFFX-HUMGAPDH/M33197_5_at	9	8.18	1.76	6.22e-05	0.0035	GAPDH	glyceraldehyde-3-phosphate dehydrogenase
AFFX-HUMGAPDH/M33197_M_at	9.51	8.92	1.51	0.0002	0.0091	GAPDH	glyceraldehyde-3-phosphate dehydrogenase
11741911_a_at	3.53	2.63	1.86	2.97e-07	4.21e-05	GBP3	guanylate binding protein 3
11733951_at	3.38	2.8	1.5	0.0281	0.2369	GBP4	guanylate binding protein 4
11721734_s_at	2.96	2.33	1.56	0.014	0.1584	GCH1	GTP cyclohydrolase 1
11720558_a_at	7.16	5.51	3.13	6.47e-05	0.0036	GEM	GTP binding protein overexpressed in skeletal muscle
11722011_a_at	3.41	2.73	1.61	0.0049	0.0837	GIMAP4	GTPase, IMAP family member 4
11739168_a_at	3.04	2.34	1.62	0.0052	0.086	GIMAP6	GTPase, IMAP family member 6
11743771_at	5.1	3.94	2.25	1.76e-05	0.0013	GIMAP7	GTPase, IMAP family member 7
11739720_a_at	3.66	2.59	2.09	2.66e-09	8.65e-07	GIMAP8	GTPase, IMAP family member 8
11716329_s_at	9.18	8.54	1.55	0.0046	0.0799	GJA1	gap junction protein alpha 1
11743924_a_at	6.12	5.2	1.9	7.6e-09	2.08e-06	GJA5	gap junction protein alpha 5
11741706_a_at	7.63	6.77	1.81	2.85e-07	4.07e-05	GJA5	gap junction protein alpha 5
11722307_at	4.02	3.32	1.63	0.0149	0.1638	GLCE	glucuronic acid epimerase
11739880_a_at	4.96	5.73	-1.71	0.002	0.0466	GLIS3	GLIS family zinc finger 3
11737723_a_at	4.55	5.24	-1.61	0.0021	0.0468	GLIS3	GLIS family zinc finger 3
11756836_s_at	2.92	3.79	-1.83	0.0007	0.021	GNA14	guanine nucleotide binding protein (G protein), alpha 14
11732426_a_at	2.71	3.32	-1.52	0.0134	0.1549	GNA14	guanine nucleotide binding protein (G protein), alpha 14
11746875_x_at	5.2	4.16	2.06	7.83e-05	0.0041	GNAI2	guanine nucleotide binding protein (G protein), alpha inhibiting activity polypeptide 2
11746874_a_at	6.05	5.12	1.89	0.0003	0.0113	GNAI2	guanine nucleotide binding protein (G protein), alpha inhibiting activity polypeptide 2
11715268_s_at	5.68	5	1.6	0.0006	0.0185	GP1BB; SEPT5; SEPT5-GP1BB	glycoprotein Ib (platelet), beta polypeptide; septin 5; SEPT5-GP1BB readthrough
11725496_a_at	3.7	4.64	-1.91	0.0002	0.007	GPAT3	glycerol-3-phosphate acyltransferase 3
11752544_a_at	5.12	4.16	1.94	5.11e-07	6.55e-05	GPNMB	glycoprotein (transmembrane) nmb
11748750_a_at	4.39	3.41	1.97	8.59e-07	0.0001	GPNMB	glycoprotein (transmembrane) nmb
11724463_a_at	6.89	6.08	1.76	5.71e-06	0.0005	GPNMB	glycoprotein (transmembrane) nmb
11724165_s_at	3.02	2.43	1.51	0.0056	0.0913	GPR146	G protein-coupled receptor 146
11758555_s_at	3.32	3.98	-1.58	0.0003	0.0117	GPR183	G protein-coupled receptor 183
11719176_a_at	3.17	2.51	1.57	5.53e-05	0.0032	GPRC5B	G protein-coupled receptor, class C, group 5, member B
11757266_s_at	6.13	4.42	3.28	3.33e-06	0.0003	GPX3	glutathione peroxidase 3
11728422_a_at	4.37	3.76	1.53	0.0363	0.271	GRASP	GRP1 (general receptor for phosphoinositides 1)-associated scaffold protein
11723586_a_at	5.5	3.79	3.27	1.2e-08	3.12e-06	GRB14	growth factor receptor bound protein 14
11727556_a_at	3.1	4.36	-2.41	2.81e-08	6.08e-06	GRHL1	grainyhead-like transcription factor 1
11728110_at	3.06	3.76	-1.62	0.0003	0.0115	GRIP1	glutamate receptor interacting protein 1
11725378_a_at	6.83	5.8	2.04	2.66e-06	0.0003	GSTO1	glutathione S-transferase omega 1
11719898_s_at	3.64	4.54	-1.86	2.12e-07	3.2e-05	HBEGF	heparin-binding EGF-like growth factor
11730580_s_at	4.32	3.49	1.77	8.12e-06	0.0007	HECW2	HECT, C2 and WW domain containing E3 ubiquitin protein ligase 2
11718309_at	8.86	7.59	2.4	9.46e-06	0.0008	HEG1	heart development protein with EGF-like domains 1
11718308_at	7.7	6.35	2.55	1.83e-05	0.0013	HEG1	heart development protein with EGF-like domains 1
11726474_a_at	4.88	4.27	1.53	0.0249	0.2225	HES4	hes family bHLH transcription factor 4
11722494_s_at	4.44	3.49	1.93	7.64e-05	0.0041	HIP1R	huntingtin interacting protein 1 related
11735775_at	3.07	3.74	-1.59	0.0005	0.0177	HIST1H4K	histone cluster 1, H4k
11756138_a_at	4.76	3.76	2	5.5e-08	1.02e-05	HK2	hexokinase 2
11716554_a_at	4.18	4.88	-1.62	0.0002	0.009	HLA-DMA	major histocompatibility complex, class II, DM alpha
11754681_s_at	4.59	5.45	-1.82	7.85e-05	0.0041	HLA-DMB	major histocompatibility complex, class II, DM beta
11733869_a_at	2.89	3.89	-1.99	4.72e-06	0.0004	HLA-DOA	major histocompatibility complex, class II, DO alpha
11758231_x_at	5.66	6.76	-2.14	2.38e-05	0.0016	HLA-DPA1	major histocompatibility complex, class II, DP alpha 1
11715583_s_at	7.86	8.61	-1.68	9.21e-05	0.0047	HLA-DPA1	major histocompatibility complex, class II, DP alpha 1
11757511_x_at	5.11	6.04	-1.91	0.0118	0.1439	HLA-DPA1	major histocompatibility complex, class II, DP alpha 1
11758417_s_at	5.86	6.84	-1.97	0.0174	0.1793	HLA-DPA1	major histocompatibility complex, class II, DP alpha 1
11760799_x_at	4.75	5.44	-1.62	0.0001	0.0054	HLA-DPB1	major histocompatibility complex, class II, DP beta 1
11758772_x_at	5.31	6.06	-1.69	0.0001	0.0065	HLA-DPB1	major histocompatibility complex, class II, DP beta 1
11755279_x_at	5.07	5.78	-1.64	0.0004	0.0135	HLA-DPB1	major histocompatibility complex, class II, DP beta 1
11758771_at	3.65	4.25	-1.51	0.0004	0.014	HLA-DPB1	major histocompatibility complex, class II, DP beta 1
11756073_x_at	4.39	5.25	-1.8	0.0014	0.0364	HLA-DPB1	major histocompatibility complex, class II, DP beta 1
11758369_x_at	3.54	4.65	-2.16	0.0051	0.0853	HLA-DPB1	major histocompatibility complex, class II, DP beta 1
11757801_x_at	5.16	5.91	-1.68	0.017	0.1773	HLA-DPB1	major histocompatibility complex, class II, DP beta 1
11759666_x_at	5.15	5.86	-1.64	0.0215	0.2041	HLA-DPB1	major histocompatibility complex, class II, DP beta 1
11724799_x_at	4.72	5.33	-1.52	1.42e-07	2.28e-05	HLA-DQA1	major histocompatibility complex, class II, DQ alpha 1
11753898_x_at	3.23	4.04	-1.75	6.04e-06	0.0005	HLA-DQA1	major histocompatibility complex, class II, DQ alpha 1
11750527_s_at	2.35	3.04	-1.61	0.0013	0.0344	HLA-DQA1; HLA-DRA	major histocompatibility complex, class II, DQ alpha 1; major histocompatibility complex, class II, DR alpha
11762641_x_at	2.65	3.4	-1.68	0.0001	0.0064	HLA-DQB1	major histocompatibility complex, class II, DQ beta 1
11744484_s_at	8.46	9.53	-2.1	3.31e-06	0.0003	HLA-DRA	major histocompatibility complex, class II, DR alpha
11742850_x_at	7.93	9.07	-2.21	0.0002	0.0103	HLA-DRA	major histocompatibility complex, class II, DR alpha
11759642_x_at	5.31	6.2	-1.85	0.0397	0.2842	HLA-DRB1	major histocompatibility complex, class II, DR beta 1
11723194_x_at	5.05	5.97	-1.9	0.0078	0.1122	HLA-DRB1; HLA-DRB3; HLA-DRB4; HLA-DRB5; LOC105369230	major histocompatibility complex, class II, DR beta 1; major histocompatibility complex, class II, DR beta 3; major histocompatibility complex, class II, DR beta 4; major histocompatibility complex, class II, DR beta 5; HLA class II histocompatibility antigen, DRB1-7 beta chain
11744374_x_at	4.87	5.55	-1.6	0.0043	0.076	HLA-DRB1; HLA-DRB3; HLA-DRB5; LOC105369230	major histocompatibility complex, class II, DR beta 1; major histocompatibility complex, class II, DR beta 3; major histocompatibility complex, class II, DR beta 5; HLA class II histocompatibility antigen, DRB1-7 beta chain
11744829_s_at	6.7	5.8	1.87	0.001	0.0286	HLA-E	major histocompatibility complex, class I, E
11751618_x_at	6.5	5.87	1.55	0.0011	0.0308	HLA-E	major histocompatibility complex, class I, E
11753404_x_at	3.96	3.35	1.53	0.0046	0.0793	HLA-E	major histocompatibility complex, class I, E
11740656_a_at	3.06	2.13	1.91	0.0002	0.0073	HMGA2	high mobility group AT-hook 2
11727376_a_at	4.71	4.12	1.5	0.0016	0.0397	HMGCR	3-hydroxy-3-methylglutaryl-CoA reductase
11725971_a_at	4.41	3.62	1.73	0.0005	0.018	HNRNPF	heterogeneous nuclear ribonucleoprotein F
11724387_at	4.58	5.26	-1.6	0.0108	0.1363	HOXB2	homeobox B2
11730130_at	6.53	4.78	3.38	4.54e-08	8.89e-06	HOXD10	homeobox D10
11724552_s_at	6.45	5.53	1.89	1.14e-06	0.0001	HPCAL1	hippocalcin-like 1
11757072_s_at	5.21	4.39	1.77	1.94e-07	2.97e-05	HS6ST1	heparan sulfate 6-O-sulfotransferase 1
11718362_at	4.91	4.09	1.76	1.26e-05	0.001	HS6ST1	heparan sulfate 6-O-sulfotransferase 1
11750207_a_at	3.87	2.97	1.87	6.25e-06	0.0006	HSD17B12	hydroxysteroid (17-beta) dehydrogenase 12
11725934_x_at	4.04	3.32	1.65	4.61e-05	0.0027	HSPA5	heat shock 70kDa protein 5 (glucose-regulated protein, 78kDa)
11725932_a_at	4.2	3.58	1.54	0.0008	0.0248	HSPA5	heat shock 70kDa protein 5 (glucose-regulated protein, 78kDa)
11725933_at	3.83	3.18	1.56	0.0168	0.1756	HSPA5	heat shock 70kDa protein 5 (glucose-regulated protein, 78kDa)
11756622_a_at	6.11	5.44	1.59	0.0051	0.0849	HSPA8	heat shock 70kDa protein 8
11726087_at	4.57	5.55	-1.97	1.37e-08	3.53e-06	HSPB3	heat shock 27kDa protein 3
11716405_a_at	10.33	9.73	1.51	1.4e-05	0.0011	HTRA1	HtrA serine peptidase 1
11747787_a_at	9.37	8.33	2.07	3.82e-05	0.0023	HTRA1	HtrA serine peptidase 1
11721390_at	3.65	2.74	1.88	3.34e-05	0.0021	HTRA3	HtrA serine peptidase 3
11757544_s_at	5.67	4.5	2.26	5.18e-05	0.003	ICAM2	intercellular adhesion molecule 2
11755992_x_at	4.14	3.09	2.06	0.0001	0.0055	ICAM2	intercellular adhesion molecule 2
11753341_x_at	3.54	2.95	1.51	0.002	0.0455	ICAM2	intercellular adhesion molecule 2
11721688_at	8.33	8.95	-1.54	4.68e-08	9.11e-06	ID4	inhibitor of DNA binding 4, dominant negative helix-loop-helix protein
11758043_s_at	5.81	6.44	-1.54	0.0002	0.007	IER2	immediate early response 2
11715893_s_at	5.41	3.07	5.07	1.57e-08	3.91e-06	IFI27	interferon, alpha-inducible protein 27
11757480_x_at	8.13	5.98	4.44	1.62e-08	3.97e-06	IFI27	interferon, alpha-inducible protein 27
11755606_x_at	5.72	6.98	-2.41	0.0007	0.0216	IFI30	interferon, gamma-inducible protein 30
11723235_a_at	4.32	3.68	1.57	1.46e-05	0.0011	IFI44L	interferon-induced protein 44-like
11715671_x_at	8.9	7.47	2.7	1.56e-08	3.91e-06	IFITM1	interferon induced transmembrane protein 1
11715670_a_at	9.02	7.26	3.38	6.52e-07	8.11e-05	IFITM1	interferon induced transmembrane protein 1
11754061_x_at	7.2	6.41	1.73	0.0004	0.0157	IFITM2	interferon induced transmembrane protein 2
11715239_x_at	8.93	8.3	1.55	0.0097	0.1281	IFITM3	interferon induced transmembrane protein 3
11728991_a_at	6.61	7.76	-2.21	4.09e-14	6.96e-11	IGDCC4	immunoglobulin superfamily, DCC subclass, member 4
11728992_s_at	6.15	7.2	-2.08	3.49e-10	1.53e-07	IGDCC4	immunoglobulin superfamily, DCC subclass, member 4
11753726_s_at	9.97	8.31	3.16	1.31e-13	1.85e-10	IGF2; INS-IGF2	insulin-like growth factor 2; INS-IGF2 readthrough
11758400_s_at	7.27	5.54	3.3	7.79e-11	4.64e-08	IGF2; INS-IGF2	insulin-like growth factor 2; INS-IGF2 readthrough
11756003_x_at	11.61	10.91	1.62	5.07e-08	9.61e-06	IGF2; INS-IGF2	insulin-like growth factor 2; INS-IGF2 readthrough
11757763_s_at	7.51	6.85	1.58	0.0004	0.0141	IGF2BP2	insulin-like growth factor 2 mRNA binding protein 2
11722583_a_at	6.52	4.81	3.26	3.27e-15	8.08e-12	IGFBP2	insulin like growth factor binding protein 2
11749912_x_at	6.17	4.13	4.13	4.95e-11	3.06e-08	IGFBP3	insulin like growth factor binding protein 3
11721135_s_at	8.75	7.58	2.25	5.35e-05	0.0031	IGFBP3	insulin like growth factor binding protein 3
11749616_s_at	3.54	2.91	1.55	0.0002	0.0089	IGFBP4	insulin like growth factor binding protein 4
11715465_at	7.02	6.39	1.54	0.0006	0.0188	IGFBP4	insulin like growth factor binding protein 4
11717909_at	2.78	2.14	1.57	5.21e-05	0.003	IGFBP6	insulin like growth factor binding protein 6
11728500_a_at	2.32	3.04	-1.64	0.0004	0.0134	IL1R2	interleukin 1 receptor, type II
11732469_at	3.8	2.68	2.17	1.73e-08	4.14e-06	IL3RA	interleukin 3 receptor, alpha (low affinity)
11715773_a_at	4.53	3.88	1.57	0.0029	0.0592	IMP3	IMP3, U3 small nucleolar ribonucleoprotein
11728829_at	4.37	3.41	1.95	8.62e-07	0.0001	INHBB	inhibin beta B
11752113_a_at	5.45	4.1	2.54	1.41e-07	2.28e-05	INPP4B	inositol polyphosphate-4-phosphatase type II B
11745470_x_at	4.59	3.71	1.84	1.75e-06	0.0002	INPP4B	inositol polyphosphate-4-phosphatase type II B
11739840_a_at	2.7	1.97	1.66	0.0001	0.0069	INPP4B	inositol polyphosphate-4-phosphatase type II B
11716338_a_at	4.11	3.35	1.7	0.0003	0.0108	INSIG1	insulin induced gene 1
11752003_a_at	6.17	5.57	1.52	0.0119	0.1449	IQGAP1	IQ motif containing GTPase activating protein 1
11717873_x_at	2.85	3.46	-1.52	0.0003	0.0118	IRF8	interferon regulatory factor 8
11718012_at	5.04	4.14	1.86	5.54e-07	7.09e-05	IRS2	insulin receptor substrate 2
11718013_at	4.81	4.14	1.58	9.88e-07	0.0001	IRS2	insulin receptor substrate 2
11724343_at	3.54	2.88	1.59	1.87e-06	0.0002	ITGA4	integrin alpha 4
11739861_s_at	5.11	3.58	2.89	1.64e-10	8.25e-08	ITGA6	integrin alpha 6
11739860_a_at	2.97	1.71	2.41	4.74e-09	1.36e-06	ITGA6	integrin alpha 6
11734677_x_at	4.42	5.1	-1.6	5.34e-08	9.96e-06	ITIH5	inter-alpha-trypsin inhibitor heavy chain family, member 5
11734676_at	4.8	5.52	-1.64	2.08e-06	0.0002	ITIH5	inter-alpha-trypsin inhibitor heavy chain family, member 5
11742697_a_at	4.69	2.5	4.57	1.69e-12	1.54e-09	ITM2A	integral membrane protein 2A
11746700_s_at	4.71	2.36	5.11	2.84e-10	1.29e-07	ITM2A	integral membrane protein 2A
11739538_at	5.04	4.13	1.88	3.37e-05	0.0021	ITPR2	inositol 1,4,5-trisphosphate receptor, type 2
11758527_s_at	6.76	5.81	1.93	0.0034	0.0649	ITPR2	inositol 1,4,5-trisphosphate receptor, type 2
11751994_s_at	7.12	6.3	1.76	2.72e-07	3.91e-05	JAG1	jagged 1
11751993_a_at	4.23	3.04	2.28	0.0001	0.0065	JAG1	jagged 1
11720823_at	6.51	5.83	1.6	0.0007	0.0206	JAG1	jagged 1
11723896_a_at	3.86	3.03	1.78	5.91e-06	0.0005	JAG2	jagged 2
11756857_a_at	5.23	5.88	-1.56	1.59e-05	0.0012	JAK2	Janus kinase 2
11718394_at	7.7	8.93	-2.33	1.03e-12	1.08e-09	JUN	jun proto-oncogene
11718397_s_at	6.88	8.12	-2.35	1.16e-10	6.31e-08	JUN	jun proto-oncogene
11718395_s_at	7.13	8.23	-2.14	7.74e-08	1.38e-05	JUN	jun proto-oncogene
11718396_x_at	6.78	7.81	-2.03	7.38e-07	9e-05	JUN	jun proto-oncogene
11741273_a_at	4.9	3.82	2.12	9.42e-05	0.0048	KCNAB1	potassium channel, voltage gated subfamily A regulatory beta subunit 1
11730465_at	2.66	3.6	-1.92	2.1e-05	0.0015	KCNJ2	potassium channel, inwardly rectifying subfamily J, member 2
11726445_at	4.24	3.04	2.29	9.16e-07	0.0001	KCNK3	potassium channel, two pore domain subfamily K, member 3
11736457_at	5.52	4.55	1.96	1.55e-12	1.47e-09	KCNK6	potassium channel, two pore domain subfamily K, member 6
11736458_x_at	5.19	4.08	2.15	8.45e-11	4.91e-08	KCNK6	potassium channel, two pore domain subfamily K, member 6
11722918_a_at	3.62	2.25	2.58	5.31e-08	9.96e-06	KCNS3	potassium voltage-gated channel, modifier subfamily S, member 3
11715947_a_at	4.41	3.58	1.77	2.47e-05	0.0017	KCTD12	potassium channel tetramerization domain containing 12
11715950_a_at	7.42	6.61	1.76	0.0001	0.0052	KCTD12	potassium channel tetramerization domain containing 12
11755062_a_at	6.56	7.47	-1.89	0.0003	0.0125	KDELC1	KDEL (Lys-Asp-Glu-Leu) containing 1
11719002_at	6.27	5.49	1.72	0.0006	0.0199	KDELR3	KDEL (Lys-Asp-Glu-Leu) endoplasmic reticulum protein retention receptor 3
11744426_x_at	3.14	2.47	1.59	0.0001	0.0067	KIAA0101	KIAA0101
11744425_a_at	3.14	2.54	1.52	0.0003	0.0127	KIAA0101	KIAA0101
11754859_x_at	3.16	3.88	-1.64	0.0005	0.0176	KIAA0226L	KIAA0226-like
11718565_at	3.7	3.11	1.5	3e-05	0.0019	KIAA1147	KIAA1147
11725716_a_at	2.45	3.04	-1.51	0.0016	0.039	KIF21A	kinesin family member 21A
11728954_a_at	4.64	3.77	1.82	3.21e-05	0.002	KITLG	KIT ligand
11729232_s_at	5.84	5.07	1.71	0.0003	0.0128	KLF3	Kruppel-like factor 3 (basic)
11719634_a_at	6.44	7.13	-1.61	0.0325	0.2561	KLF4	Kruppel-like factor 4 (gut)
11716095_s_at	8.29	8.88	-1.51	1.05e-07	1.82e-05	KLF6	Kruppel-like factor 6
11729175_at	4.19	4.94	-1.68	7.2e-07	8.8e-05	KLHL4	kelch-like family member 4
11729176_at	4.47	5.08	-1.53	3.3e-05	0.0021	KLHL4	kelch-like family member 4
11728768_s_at	6.41	7.36	-1.94	0.0064	0.0992	KLHL5	kelch-like family member 5
11732927_x_at	2.09	2.99	-1.86	8e-05	0.0042	KLRC1	killer cell lectin-like receptor subfamily C, member 1
11731848_s_at	1.83	2.57	-1.67	0.0001	0.0055	KLRC1; KLRC2	killer cell lectin-like receptor subfamily C, member 1; killer cell lectin-like receptor subfamily C, member 2
11715683_a_at	3.12	2.09	2.04	5.86e-07	7.44e-05	KRT7	keratin 7, type II
11715280_s_at	3.69	2.91	1.72	0.0062	0.097	KRT17	keratin 17, type I
11738028_a_at	2.8	2.15	1.58	1.16e-06	0.0001	LAMA1	laminin, alpha 1
11753275_a_at	8.32	7.69	1.54	0.003	0.06	LAPTM4A	lysosomal protein transmembrane 4 alpha
11742923_a_at	3.42	4.02	-1.52	0.0289	0.241	LAPTM5	lysosomal protein transmembrane 5
11716162_at	5.95	4.53	2.68	7.06e-10	2.72e-07	LBH	limb bud and heart development
11716161_s_at	3.63	2.94	1.62	3.21e-06	0.0003	LBH	limb bud and heart development
11720028_x_at	5.75	4.97	1.72	0.0003	0.0124	LDLR	low density lipoprotein receptor
11726871_s_at	6.27	5.67	1.51	0.0032	0.0628	LEPR	leptin receptor
11740298_a_at	5.46	4.36	2.13	2.25e-06	0.0002	LEPROTL1	leptin receptor overlapping transcript-like 1
11716264_at	4.38	3.34	2.06	5.44e-06	0.0005	LEPROTL1	leptin receptor overlapping transcript-like 1
11716263_s_at	7.36	6.64	1.65	0.0002	0.0083	LEPROTL1	leptin receptor overlapping transcript-like 1
11715370_s_at	4.56	3.91	1.57	0.0053	0.0869	LGALS3BP	lectin, galactoside-binding, soluble, 3 binding protein
11720541_at	4.52	3.93	1.5	0.0014	0.036	LGALSL	lectin, galactoside-binding-like
11746287_x_at	5.64	4.98	1.58	0.0059	0.0936	LGMN	legumain
11763337_a_at	2.06	3.67	-3.06	3.04e-11	1.98e-08	LHX6	LIM homeobox 6
11738398_a_at	1.88	2.49	-1.53	4.34e-07	5.76e-05	LHX6	LIM homeobox 6
11722685_s_at	6.67	7.46	-1.72	0.0068	0.102	LIFR	leukemia inhibitory factor receptor alpha
11730813_at	2.47	3.1	-1.55	0.0005	0.0172	LILRB4	leukocyte immunoglobulin-like receptor, subfamily B (with TM and ITIM domains), member 4
11746719_a_at	4.46	3.81	1.58	2.03e-05	0.0014	LMCD1	LIM and cysteine-rich domains 1
11750298_a_at	6.52	5.94	1.5	7.19e-05	0.0039	LMCD1	LIM and cysteine-rich domains 1
11730469_s_at	6.65	4.3	5.11	2.61e-09	8.59e-07	LMO2	LIM domain only 2 (rhombotin-like 1)
11744351_a_at	6.62	5.79	1.78	6.95e-05	0.0038	LOC728392; NLRP1	uncharacterized LOC728392; NLR family, pyrin domain containing 1
11730703_a_at	2.92	2.25	1.6	0.0003	0.0131	LOC729966; PDE4C	uncharacterized LOC729966; phosphodiesterase 4C, cAMP-specific
11759939_x_at	4.98	4.26	1.65	0.0025	0.0531	LOC100131541	uncharacterized LOC100131541
11728201_at	6.34	5.55	1.72	6.1e-06	0.0005	LOX	lysyl oxidase
11758995_at	7.34	6.68	1.58	0.0011	0.0297	LOX	lysyl oxidase
11746597_a_at	3.86	3.27	1.51	0.003	0.0604	LOX	lysyl oxidase
11729750_a_at	4.54	6.09	-2.92	9.33e-08	1.64e-05	LPAR1	lysophosphatidic acid receptor 1
11725417_a_at	6.29	4.75	2.91	2.63e-07	3.81e-05	LPCAT2	lysophosphatidylcholine acyltransferase 2
11725419_a_at	5.01	4.17	1.79	2.97e-05	0.0019	LPCAT2	lysophosphatidylcholine acyltransferase 2
11726291_a_at	3.13	2.43	1.63	0.0046	0.0793	LRRC17	leucine rich repeat containing 17
11728945_x_at	3.34	4.06	-1.65	2.08e-05	0.0014	LST1	leukocyte specific transcript 1
11728944_a_at	4.68	5.4	-1.65	2.66e-05	0.0018	LST1	leukocyte specific transcript 1
11746186_x_at	3.85	2.98	1.84	1.74e-05	0.0013	LTBP4	latent transforming growth factor beta binding protein 4
11757553_x_at	4.22	3.12	2.14	1.77e-05	0.0013	LTBP4	latent transforming growth factor beta binding protein 4
11720748_a_at	3.9	3.01	1.85	0.0033	0.0643	LTBP4	latent transforming growth factor beta binding protein 4
11729076_x_at	3.61	2.87	1.67	0.0101	0.1312	LTC4S	leukotriene C4 synthase
11729075_s_at	4.74	4.14	1.51	0.0268	0.2313	LTC4S; MAML1	leukotriene C4 synthase; mastermind-like transcriptional coactivator 1
11728507_at	2.84	3.51	-1.59	0.0039	0.0711	LY96	lymphocyte antigen 96
11757798_s_at	5.05	5.86	-1.75	0.0139	0.158	MAFB	v-maf avian musculoaponeurotic fibrosarcoma oncogene homolog B
11757043_a_at	5.37	4.75	1.53	0.0104	0.133	MAGED2	MAGE family member D2
11717899_x_at	4.51	3.88	1.55	0.0008	0.0248	MAGT1	magnesium transporter 1
11745724_at	8.38	9.1	-1.65	1.07e-06	0.0001	MALAT1	metastasis associated lung adenocarcinoma transcript 1 (non-protein coding)
11719499_at	3.9	5.95	-4.15	9.94e-14	1.49e-10	MAOB	monoamine oxidase B
11733832_a_at	2.92	1.94	1.98	2.51e-07	3.66e-05	MAP2	microtubule associated protein 2
11736559_a_at	4.28	3.01	2.42	2.37e-05	0.0016	MAP2	microtubule associated protein 2
11746124_x_at	4.66	3.22	2.72	7.2e-08	1.31e-05	MAP3K7CL	MAP3K7 C-terminal like
11747047_a_at	6.49	5.48	2.01	1.26e-05	0.001	MAP3K7CL	MAP3K7 C-terminal like
11749774_x_at	4.8	3.76	2.06	0.0002	0.0082	MAP3K7CL	MAP3K7 C-terminal like
11723181_a_at	4.05	3.32	1.66	0.0001	0.0055	MAPK4	mitogen-activated protein kinase 4
11730066_s_at	3.24	2.64	1.51	0.0443	0.2999	MAPK10	mitogen-activated protein kinase 10
11764039_s_at	4.99	3.87	2.17	1.38e-07	2.25e-05	MAPRE2	microtubule-associated protein, RP/EB family, member 2
11740972_a_at	2.54	1.91	1.54	0.0005	0.0164	MAPRE2	microtubule-associated protein, RP/EB family, member 2
11759088_at	4.13	5.05	-1.88	4.33e-05	0.0026	MARCH1	membrane associated ring finger 1
11726193_at	3.74	2.8	1.92	1.16e-07	1.99e-05	MARCH4	membrane associated ring finger 4
11754998_a_at	4.37	2.4	3.94	1.74e-10	8.67e-08	MCTP1	multiple C2 domains, transmembrane 1
11753088_a_at	2.89	2.11	1.72	6.85e-06	0.0006	MCTP1	multiple C2 domains, transmembrane 1
11752379_a_at	4.09	3.27	1.76	0.0004	0.0135	MCTP1	multiple C2 domains, transmembrane 1
11746952_x_at	3.12	2.47	1.57	0.0012	0.0314	MDK	midkine (neurite growth-promoting factor 2)
11734507_s_at	5.17	3.51	3.17	4.33e-07	5.76e-05	MECOM	MDS1 and EVI1 complex locus
11734506_a_at	4.24	3.07	2.24	1.45e-06	0.0002	MECOM	MDS1 and EVI1 complex locus
11727645_a_at	5.79	4.24	2.92	9.96e-06	0.0008	MECOM	MDS1 and EVI1 complex locus
11736363_s_at	5.07	4.16	1.88	0.0009	0.0254	MEDAG	mesenteric estrogen-dependent adipogenesis
11723214_a_at	5.67	4.84	1.78	2.97e-06	0.0003	MEF2C	myocyte enhancer factor 2C
11723215_s_at	7.06	6.04	2.02	1.29e-05	0.001	MEF2C	myocyte enhancer factor 2C
11723213_a_at	5.61	4.99	1.54	0.0006	0.0203	MEF2C	myocyte enhancer factor 2C
11755781_a_at	4.94	4.17	1.71	1.5e-07	2.4e-05	MEGF6	multiple EGF-like-domains 6
11723028_a_at	3.74	2.82	1.89	4.44e-06	0.0004	MEST	mesoderm specific transcript
11758268_s_at	4.03	3.34	1.61	1.09e-05	0.0009	MEST	mesoderm specific transcript
11717196_a_at	7.39	6.75	1.56	5.53e-05	0.0032	MEST	mesoderm specific transcript
11723029_x_at	3.31	2.68	1.55	0.0025	0.0536	MEST	mesoderm specific transcript
11755094_a_at	5.78	5.08	1.63	7.89e-06	0.0007	MEX3D	mex-3 RNA binding family member D
11756810_a_at	4.96	3.97	2	1.23e-06	0.0001	MFAP2	microfibrillar associated protein 2
11726527_s_at	2.82	2.14	1.6	3.94e-05	0.0024	MFAP3L	microfibrillar associated protein 3 like
11721846_a_at	6.58	5.51	2.09	1.82e-05	0.0013	MFAP5	microfibrillar associated protein 5
11721845_a_at	4.73	3.57	2.23	2.81e-05	0.0018	MFAP5	microfibrillar associated protein 5
11724499_at	3.89	3.28	1.53	0.0019	0.0452	MFNG	MFNG O-fucosylpeptide 3-beta-N-acetylglucosaminyltransferase
11744415_s_at	4.82	3.86	1.95	0.0034	0.0653	MFSD6	major facilitator superfamily domain containing 6
11739184_a_at	3.92	3.24	1.61	0.0012	0.032	MGAT4B	mannosyl (alpha-1,3-)-glycoprotein beta-1,4-N-acetylglucosaminyltransferase, isozyme B
11760556_at	2.77	3.37	-1.51	0.0003	0.0121	MGC24103	uncharacterized MGC24103
11717763_a_at	6.25	5.21	2.05	0.0005	0.0167	MGLL	monoglyceride lipase
11717764_x_at	6.51	5.69	1.77	0.0008	0.0244	MGLL	monoglyceride lipase
11720201_at	4.76	4.17	1.51	0.0003	0.0128	MGMT	O-6-methylguanine-DNA methyltransferase
11758746_a_at	5.72	4.33	2.63	4.81e-05	0.0028	MGP	matrix Gla protein
11716203_a_at	11.26	10.36	1.87	0.0012	0.0324	MGP	matrix Gla protein
11725725_a_at	6.09	6.73	-1.56	2.9e-05	0.0019	MICAL3	microtubule associated monooxygenase, calponin and LIM domain containing 3
11744470_x_at	9.21	8.62	1.51	5.57e-05	0.0032	MIF	macrophage migration inhibitory factor (glycosylation-inhibiting factor)
11754630_a_at	4.7	3.95	1.68	0.0007	0.0219	MLKL	mixed lineage kinase domain-like
11741377_a_at	5.9	3.76	4.41	1.5e-09	5.31e-07	MMP2	matrix metallopeptidase 2
11743250_a_at	6.05	4.32	3.32	1.73e-08	4.14e-06	MMP2	matrix metallopeptidase 2
11743251_s_at	8.54	7.09	2.74	6.2e-07	7.78e-05	MMP2	matrix metallopeptidase 2
11748235_a_at	4.82	3.25	2.96	0.0003	0.0132	MMRN1	multimerin 1
11722925_x_at	4.06	3.05	2.01	0.0067	0.1016	MMRN1	multimerin 1
11722924_a_at	4.32	3.37	1.93	0.0317	0.2526	MMRN1	multimerin 1
11750671_s_at	3.17	2.35	1.76	0.0001	0.0066	MMRN2	multimerin 2
11739046_s_at	5.91	4.48	2.7	0.001	0.0278	MMRN2	multimerin 2
11729251_at	2.99	4.01	-2.03	0.0005	0.0164	MNDA	myeloid cell nuclear differentiation antigen
11725168_s_at	3.32	2.58	1.67	6.69e-07	8.28e-05	MOB3B	MOB kinase activator 3B
11721347_a_at	2.58	3.18	-1.51	0.0417	0.2915	MPEG1	macrophage expressed 1
11719833_at	6.24	4.7	2.93	3.17e-05	0.002	MPZL2	myelin protein zero-like 2
11720387_a_at	7.23	6.4	1.78	1.01e-05	0.0008	MRC2	mannose receptor, C type 2
11745054_a_at	5.76	5.15	1.52	0.005	0.0841	MRPL43	mitochondrial ribosomal protein L43
11749293_x_at	4.17	5.1	-1.91	0.0006	0.0186	MS4A6A	membrane-spanning 4-domains, subfamily A, member 6A
11723849_a_at	3.51	4.18	-1.59	0.0026	0.0554	MS4A6A	membrane-spanning 4-domains, subfamily A, member 6A
11716846_a_at	5.29	6.25	-1.95	0.0033	0.0643	MS4A6A	membrane-spanning 4-domains, subfamily A, member 6A
11740871_a_at	3.31	4.19	-1.84	0.0019	0.0439	MS4A7	membrane-spanning 4-domains, subfamily A, member 7
11740092_x_at	2.61	2.02	1.51	5.03e-06	0.0005	MSMO1	methylsterol monooxygenase 1
11737428_a_at	4.06	5.27	-2.31	3.52e-07	4.83e-05	MSR1	macrophage scavenger receptor 1
11737429_x_at	4.03	4.94	-1.89	1.15e-05	0.0009	MSR1	macrophage scavenger receptor 1
11756089_s_at	2.77	3.62	-1.81	0.0001	0.0061	MSR1	macrophage scavenger receptor 1
11730340_x_at	2.83	3.48	-1.57	4.37e-07	5.77e-05	MSX2	msh homeobox 2
11745892_a_at	6.6	5.77	1.78	0.0005	0.0159	MTHFD2	methylenetetrahydrofolate dehydrogenase (NADP+ dependent) 2, methenyltetrahydrofolate cyclohydrolase
11716914_a_at	4.31	3.33	1.96	0.0016	0.0391	MTUS1	microtubule associated tumor suppressor 1
11764221_s_at	5.63	6.29	-1.58	0.0079	0.1127	MUM1L1	melanoma associated antigen (mutated) 1-like 1
11744072_at	4.21	5.19	-1.98	1.75e-06	0.0002	MXRA5	matrix-remodelling associated 5
11730878_x_at	3.67	2.9	1.71	1.37e-05	0.001	MYCT1	myc target 1
11716684_a_at	5.39	4.61	1.72	8.68e-06	0.0007	MYO1D	myosin ID
11716685_s_at	4.35	3.37	1.98	0.0002	0.0083	MYO1D	myosin ID
11744347_a_at	4.3	3.59	1.63	0.0004	0.0154	MYO10	myosin X
11723377_a_at	3.08	3.72	-1.55	0.0015	0.038	MYZAP	myocardial zonula adherens protein
11733494_a_at	5.75	6.39	-1.56	0.0002	0.0081	N4BP2L2	NEDD4 binding protein 2-like 2
11746795_s_at	3.63	4.41	-1.72	0.0051	0.0851	NADK2	NAD kinase 2, mitochondrial
11723143_at	3.88	3.14	1.67	3.44e-05	0.0021	NALCN	sodium leak channel, non selective
11757767_s_at	6.9	6.2	1.62	6.73e-07	8.3e-05	NAV1	neuron navigator 1
11725410_at	4.29	3.45	1.79	2.9e-06	0.0003	NAV1	neuron navigator 1
11761515_s_at	9.41	10.25	-1.79	1.28e-06	0.0001	ND1	NADH dehydrogenase, subunit 1 (complex I)
11754337_s_at	7.75	6.66	2.13	1.08e-06	0.0001	NDRG1	N-myc downstream regulated 1
11736068_x_at	3.45	4.68	-2.36	4.65e-06	0.0004	NDRG4	NDRG family member 4
11743415_s_at	2.33	3.16	-1.78	0.0009	0.0258	NDRG4	NDRG family member 4
11717202_x_at	3.59	2.11	2.79	1.53e-15	4.44e-12	NDUFA4L2	NADH dehydrogenase (ubiquinone) 1 alpha subcomplex, 4-like 2
11757513_at	7.45	8.43	-1.97	4.08e-11	2.58e-08	NFKBIZ	nuclear factor of kappa light polypeptide gene enhancer in B-cells inhibitor, zeta
11733066_at	4.92	5.54	-1.53	0.013	0.1521	NFYB	nuclear transcription factor Y subunit beta
11755758_s_at	6.68	7.29	-1.53	9.78e-06	0.0008	NLRC5	NLR family, CARD domain containing 5
11728377_x_at	3.98	2.29	3.23	3.24e-10	1.44e-07	NMU	neuromedin U
11728376_s_at	2.98	1.79	2.27	1.04e-06	0.0001	NMU	neuromedin U
11721965_a_at	4.99	3.1	3.69	2e-14	4.13e-11	NOTCH4	notch 4
11747259_a_at	4.22	5.35	-2.2	3.59e-08	7.38e-06	NOV	nephroblastoma overexpressed
11723033_at	6.65	7.85	-2.3	4.38e-06	0.0004	NOV	nephroblastoma overexpressed
11731680_a_at	5.17	3.47	3.24	1.51e-12	1.46e-09	NOX4	NADPH oxidase 4
11740475_x_at	6.48	4.45	4.09	1.69e-12	1.54e-09	NOX4	NADPH oxidase 4
11741143_x_at	5.06	3.59	2.77	1.8e-11	1.23e-08	NOX4	NADPH oxidase 4
11740476_a_at	4.5	3.22	2.43	4.13e-09	1.22e-06	NOX4	NADPH oxidase 4
11755736_a_at	3.6	2.26	2.54	6.4e-09	1.78e-06	NOX4	NADPH oxidase 4
11744205_x_at	6.05	5.46	1.5	0.0236	0.2155	NPDC1	neural proliferation, differentiation and control, 1
11755047_a_at	7.31	6.7	1.53	1.67e-05	0.0012	NPLOC4	NPL4 homolog, ubiquitin recognition factor
11718435_a_at	2.24	4.63	-5.26	1.59e-16	7.87e-13	NPNT	nephronectin
11722758_at	5.38	3.13	4.77	5.1e-20	2.52e-15	NPR3	natriuretic peptide receptor 3
11746683_a_at	3.12	2.3	1.76	3.55e-08	7.34e-06	NPR3	natriuretic peptide receptor 3
11726588_a_at	5.35	4.71	1.56	0.0016	0.0395	NPTN	neuroplastin
11720005_at	2.54	3.13	-1.51	7.11e-07	8.75e-05	NPTX2	neuronal pentraxin II
11759135_x_at	5.93	6.72	-1.72	0.0002	0.0092	NR4A1	nuclear receptor subfamily 4, group A, member 1
11717994_a_at	5.97	6.63	-1.58	0.0025	0.0539	NR4A1	nuclear receptor subfamily 4, group A, member 1
11742478_a_at	2.05	3.69	-3.12	2.32e-08	5.25e-06	NRG1	neuregulin 1
11741304_a_at	1.59	2.5	-1.88	5.69e-05	0.0032	NRG1	neuregulin 1
11740347_x_at	2.18	2.82	-1.56	0.0006	0.0204	NRG1	neuregulin 1
11732333_at	3.81	3.19	1.53	2.05e-05	0.0014	NRIP2	nuclear receptor interacting protein 2
11757802_s_at	3.2	2.46	1.68	1.56e-05	0.0012	NRK	Nik related kinase
11718539_a_at	4.14	2.84	2.47	6.66e-05	0.0037	NRN1	neuritin 1
11743191_a_at	5.24	3.94	2.47	5.79e-09	1.63e-06	NTM	neurotrimin
11731649_x_at	4.96	4.23	1.67	9.39e-06	0.0008	NTM	neurotrimin
11731648_a_at	3.82	3.13	1.61	0.0001	0.0057	NTM	neurotrimin
11731650_a_at	4.04	3.34	1.63	0.0001	0.0062	NTM	neurotrimin
11717803_a_at	3.88	2.11	3.41	4.88e-08	9.38e-06	NTN4	netrin 4
11720080_at	6.01	4.62	2.62	4.83e-06	0.0004	NTRK2	neurotrophic tyrosine kinase, receptor, type 2
11756914_a_at	4.21	3.13	2.12	9.01e-06	0.0007	NTRK2	neurotrophic tyrosine kinase, receptor, type 2
11720079_at	4.25	3.33	1.89	1.33e-05	0.001	NTRK2	neurotrophic tyrosine kinase, receptor, type 2
11720078_a_at	3.71	3.02	1.61	0.0001	0.0059	NTRK2	neurotrophic tyrosine kinase, receptor, type 2
11728647_at	4.83	4.15	1.59	0.0004	0.0137	NUCKS1	nuclear casein kinase and cyclin-dependent kinase substrate 1
11736254_a_at	5.35	4.61	1.66	0.0004	0.0138	NUP160	nucleoporin 160kDa
11736253_a_at	5.28	4.69	1.51	0.0044	0.0775	NUP160	nucleoporin 160kDa
11723699_s_at	3.76	2.69	2.11	0.0002	0.01	OAS2; OAS3	2'-5'-oligoadenylate synthetase 2; 2'-5'-oligoadenylate synthetase 3
11717017_a_at	4.12	2.58	2.9	1.98e-09	6.8e-07	OCIAD2	OCIA domain containing 2
11733433_a_at	2.67	1.72	1.93	1.4e-08	3.57e-06	ODAM	odontogenic, ameloblast asssociated
11736191_s_at	10.25	8.81	2.71	1.38e-08	3.53e-06	OGN	osteoglycin
11742820_s_at	8	6.24	3.39	8.2e-08	1.46e-05	OGN	osteoglycin
11742821_s_at	9.12	7.47	3.14	4.58e-07	5.98e-05	OGN	osteoglycin
11748546_a_at	7.3	5.55	3.36	6.66e-07	8.26e-05	OGN	osteoglycin
11736190_a_at	8.98	7.29	3.23	9.65e-07	0.0001	OGN	osteoglycin
11749326_s_at	5.68	5.09	1.51	0.0036	0.0678	OLFML2B	olfactomedin like 2B
11725547_a_at	3.32	3.91	-1.5	0.0018	0.0436	OPCML	opioid binding protein/cell adhesion molecule-like
11725545_a_at	2.77	3.5	-1.66	0.0022	0.0493	OPCML	opioid binding protein/cell adhesion molecule-like
11729044_at	7.65	4.38	9.69	2.41e-18	2.97e-14	OR51E1	olfactory receptor, family 51, subfamily E, member 1
11729043_a_at	4.77	2.95	3.54	4.08e-11	2.58e-08	OR51E1	olfactory receptor, family 51, subfamily E, member 1
11740020_at	1.93	2.55	-1.53	3.82e-05	0.0023	OTC	ornithine carbamoyltransferase
11730955_a_at	8.58	9.22	-1.56	0.0003	0.0104	P2RX1	purinergic receptor P2X, ligand gated ion channel, 1
11734296_a_at	5.14	3.96	2.28	7.63e-05	0.0041	P2RY14	purinergic receptor P2Y, G-protein coupled, 14
11733632_s_at	7.35	6.6	1.68	0.0021	0.0468	P2RY14	purinergic receptor P2Y, G-protein coupled, 14
11727597_at	4.05	2.94	2.16	6.83e-10	2.7e-07	PADI2	peptidyl arginine deiminase, type II
11718870_a_at	5.52	4.26	2.39	6.43e-05	0.0036	PALMD	palmdelphin
11718871_x_at	5.65	4.51	2.21	0.0001	0.0057	PALMD	palmdelphin
11718869_x_at	4.21	3.19	2.03	0.0005	0.0176	PALMD	palmdelphin
11718868_a_at	3.56	2.65	1.88	0.0017	0.0416	PALMD	palmdelphin
11740278_s_at	8.25	7.58	1.59	0.0062	0.097	PAM	peptidylglycine alpha-amidating monooxygenase
11727014_at	3.93	3.01	1.89	2.81e-05	0.0018	PAPPA	pregnancy-associated plasma protein A, pappalysin 1
11727016_s_at	6.26	5.65	1.52	0.0002	0.0085	PAPPA	pregnancy-associated plasma protein A, pappalysin 1
11754579_at	6.37	5.75	1.54	0.0003	0.011	PAPPA	pregnancy-associated plasma protein A, pappalysin 1
11727034_at	5.93	5.08	1.81	0.0002	0.0088	PAPSS2	3'-phosphoadenosine 5'-phosphosulfate synthase 2
11758394_s_at	7.74	8.42	-1.6	7.81e-05	0.0041	PARM1	prostate androgen-regulated mucin-like protein 1
11724981_at	4.19	4.81	-1.54	0.0001	0.0061	PCDH7	protocadherin 7
11731432_at	4.61	3.37	2.36	2.17e-07	3.26e-05	PCDH10	protocadherin 10
11722232_a_at	7.05	5.65	2.64	6.16e-08	1.13e-05	PCP4	Purkinje cell protein 4
11754738_a_at	3.14	2.2	1.91	0.0003	0.0119	PDE2A	phosphodiesterase 2A, cGMP-stimulated
11724095_a_at	6.05	4.91	2.2	3.48e-05	0.0022	PDE4B	phosphodiesterase 4B, cAMP-specific
11720579_a_at	6.01	4.7	2.48	6.4e-10	2.59e-07	PDE5A	phosphodiesterase 5A, cGMP-specific
11757985_s_at	5.77	6.48	-1.64	0.0002	0.0083	PDE7B	phosphodiesterase 7B
11738185_s_at	5.62	4.15	2.77	6.92e-10	2.71e-07	PDE8B	phosphodiesterase 8B
11743088_s_at	4.42	3.37	2.08	3.8e-09	1.14e-06	PDE8B	phosphodiesterase 8B
11729063_a_at	7.36	6.7	1.57	2.59e-05	0.0017	PDGFA	platelet-derived growth factor alpha polypeptide
11731667_s_at	4.23	3.47	1.69	2.55e-05	0.0017	PDGFB	platelet-derived growth factor beta polypeptide
11715434_a_at	4.67	3.95	1.65	0.0004	0.0135	PDIA6	protein disulfide isomerase family A, member 6
11733981_a_at	5.95	4.86	2.13	6.2e-07	7.78e-05	PDK1	pyruvate dehydrogenase kinase, isozyme 1
11755106_a_at	8.54	9.16	-1.54	0.0143	0.1604	PDLIM3	PDZ and LIM domain 3
11732925_s_at	3.89	3.09	1.74	4.4e-06	0.0004	PEAR1	platelet endothelial aggregation receptor 1
11720644_a_at	6.66	4.46	4.6	5.1e-06	0.0005	PECAM1	platelet/endothelial cell adhesion molecule 1
11757545_x_at	8.95	7.26	3.21	1.69e-05	0.0012	PECAM1	platelet/endothelial cell adhesion molecule 1
11722471_a_at	5.36	4.77	1.5	0.0061	0.0963	PEG3	paternally expressed 3
11715701_s_at	6.91	5.45	2.74	1.08e-09	3.93e-07	PFN2	profilin 2
11750286_x_at	7.25	6.67	1.5	0.0021	0.0468	PGAM1	phosphoglycerate mutase 1 (brain)
11757940_at	2.95	2.26	1.61	0.0399	0.285	PGF	placental growth factor
11753086_x_at	5.48	4.61	1.82	1.4e-07	2.27e-05	PGK1	phosphoglycerate kinase 1
11753085_a_at	5.94	4.95	1.99	6.09e-07	7.7e-05	PGK1	phosphoglycerate kinase 1
11752939_x_at	6.68	5.92	1.69	2.19e-06	0.0002	PGK1	phosphoglycerate kinase 1
11733873_a_at	7.3	6.51	1.74	5.23e-06	0.0005	PGK1	phosphoglycerate kinase 1
11724777_at	4.1	3.49	1.53	0.0069	0.1033	PGM2L1	phosphoglucomutase 2-like 1
11726168_at	4.12	4.8	-1.61	0.0034	0.0653	PGR	progesterone receptor
11758737_s_at	6.6	5.94	1.58	3.52e-05	0.0022	PGRMC2	progesterone receptor membrane component 2
11753313_a_at	4.81	4.07	1.67	0.0026	0.0546	PHB2	prohibitin 2
11721306_at	5.25	4.1	2.22	7.18e-06	0.0006	PHLDA1	pleckstrin homology-like domain, family A, member 1
11721305_a_at	3.03	2.25	1.72	0.0022	0.0496	PHLDA1	pleckstrin homology-like domain, family A, member 1
11726938_a_at	6.81	6.08	1.66	0.0083	0.1165	PHPT1	phosphohistidine phosphatase 1
11717662_a_at	5.53	4.87	1.58	0.0015	0.0375	PIEZO1	piezo-type mechanosensitive ion channel component 1
11754316_a_at	4.08	2.78	2.47	2.99e-08	6.43e-06	PIK3R3	phosphoinositide-3-kinase, regulatory subunit 3 (gamma)
11721762_a_at	2.48	3.1	-1.54	0.0003	0.0114	PIK3R5	phosphoinositide-3-kinase, regulatory subunit 5
11722787_a_at	4.11	3.44	1.59	0.0017	0.0402	PKM	pyruvate kinase, muscle
11757057_x_at	3.57	4.55	-1.98	0.0015	0.0366	PLA2G2A	phospholipase A2, group IIA (platelets, synovial fluid)
11727754_a_at	4.01	2.54	2.78	2.4e-08	5.36e-06	PLA2G4A	phospholipase A2, group IVA (cytosolic, calcium-dependent)
11741638_a_at	3.97	3.16	1.76	9.83e-09	2.62e-06	PLAG1	pleiomorphic adenoma gene 1
11736801_a_at	3.64	2.68	1.94	2e-08	4.63e-06	PLAG1	pleiomorphic adenoma gene 1
11732321_a_at	2.97	2.32	1.56	0.0023	0.0512	PLAT	plasminogen activator, tissue
11730106_a_at	5.79	5.17	1.54	0.0002	0.0081	PLCB1	phospholipase C, beta 1 (phosphoinositide-specific)
11720452_at	5.88	6.98	-2.13	3.63e-06	0.0003	PLEKHH2	pleckstrin homology domain containing, family H (with MyTH4 domain) member 2
11749491_a_at	5.79	4.87	1.88	3.85e-07	5.21e-05	PLOD1	procollagen-lysine, 2-oxoglutarate 5-dioxygenase 1
11715611_a_at	6.41	5.54	1.83	7.74e-07	9.35e-05	PLOD1	procollagen-lysine, 2-oxoglutarate 5-dioxygenase 1
11721333_a_at	7.57	6.98	1.5	1.66e-06	0.0002	PLOD2	procollagen-lysine, 2-oxoglutarate 5-dioxygenase 2
11739036_a_at	2.64	4.93	-4.89	9.07e-16	2.99e-12	PLP1	proteolipid protein 1
11723411_s_at	2.09	3.25	-2.22	1.91e-06	0.0002	PLP1	proteolipid protein 1
11739037_s_at	1.64	2.56	-1.89	2.12e-06	0.0002	PLP1	proteolipid protein 1
11741315_a_at	7.68	6.85	1.78	0.0009	0.0266	PLSCR4	phospholipid scramblase 4
11716920_at	3.21	2.07	2.2	1.97e-06	0.0002	PLVAP	plasmalemma vesicle associated protein
11754468_x_at	3.74	2.3	2.71	2.52e-09	8.34e-07	PLXDC1	plexin domain containing 1
11726844_a_at	3.89	2.6	2.44	4.87e-08	9.38e-06	PLXDC1	plexin domain containing 1
11726846_at	3.57	2.38	2.28	4.91e-08	9.39e-06	PLXDC1	plexin domain containing 1
11726845_s_at	4.77	3.69	2.11	2.29e-05	0.0016	PLXDC1	plexin domain containing 1
11751084_s_at	5.58	4.92	1.58	0.0082	0.1155	PLXND1	plexin D1
11716151_a_at	7.09	6.13	1.94	3.76e-09	1.13e-06	PMEPA1	prostate transmembrane protein, androgen induced 1
11716149_a_at	6.8	5.53	2.41	1.17e-07	2e-05	PMEPA1	prostate transmembrane protein, androgen induced 1
11716150_a_at	5.16	4.17	1.98	1.22e-07	2.07e-05	PMEPA1	prostate transmembrane protein, androgen induced 1
11718400_a_at	5.26	4.41	1.8	1.23e-05	0.001	PNP	purine nucleoside phosphorylase
11736678_s_at	6.81	4.24	5.92	1.44e-08	3.65e-06	PODXL	podocalyxin-like
11715763_a_at	7.37	4.57	7	1.82e-08	4.27e-06	PODXL	podocalyxin-like
11717199_a_at	4.95	4.34	1.52	5.24e-05	0.003	POLR1D	polymerase (RNA) I polypeptide D
11736422_s_at	6.29	4.21	4.22	0.0002	0.0093	POSTN	periostin, osteoblast specific factor
11736423_a_at	4.87	3.39	2.78	0.0003	0.0131	POSTN	periostin, osteoblast specific factor
11747927_a_at	5.34	3.7	3.14	0.0005	0.0159	POSTN	periostin, osteoblast specific factor
11747928_x_at	4.75	3.65	2.14	0.0008	0.0237	POSTN	periostin, osteoblast specific factor
11718152_a_at	3.06	2.44	1.54	0.0005	0.0176	PPFIBP2	PTPRF interacting protein, binding protein 2 (liprin beta 2)
11724923_at	5.3	5.9	-1.51	2.69e-05	0.0018	PPP1R9A	protein phosphatase 1, regulatory subunit 9A
11746840_a_at	5.57	6.42	-1.8	4.68e-05	0.0028	PPP1R9A	protein phosphatase 1, regulatory subunit 9A
11749158_a_at	4.8	4.21	1.51	0.0032	0.0626	PPP2R1A	protein phosphatase 2, regulatory subunit A, alpha
11756949_a_at	5.63	4.91	1.65	0.0082	0.1153	PPP2R1A	protein phosphatase 2, regulatory subunit A, alpha
11716358_s_at	3.97	3.31	1.58	0.0006	0.0195	PRC1	protein regulator of cytokinesis 1
11752948_a_at	5.55	4.51	2.06	0.0039	0.0723	PRCP	prolylcarboxypeptidase
11715855_a_at	5.23	4.16	2.1	0.0051	0.0856	PRCP	prolylcarboxypeptidase
11715856_s_at	7.02	6.42	1.51	0.0261	0.2277	PRCP	prolylcarboxypeptidase
11745463_x_at	3.98	3.36	1.53	0.0013	0.0337	PRDX2	peroxiredoxin 2
11753893_a_at	7.86	7.22	1.55	0.0021	0.047	PRELP	proline/arginine-rich end leucine-rich repeat protein
11754557_s_at	5.66	5.06	1.52	0.0002	0.0072	PRKCA	protein kinase C, alpha
11736257_at	4.31	3.68	1.54	0.0012	0.0323	PRKCE	protein kinase C, epsilon
11718811_s_at	4.64	3.81	1.78	0.0244	0.2196	PRKCH	protein kinase C, eta
11729036_x_at	3.8	3.12	1.6	1.88e-05	0.0013	PRKY	protein kinase, Y-linked, pseudogene
11723501_at	2.76	2.13	1.55	0.0127	0.1499	PRLR	prolactin receptor
11715825_a_at	6.33	5.67	1.58	0.0039	0.0723	PRMT1	protein arginine methyltransferase 1
11743844_a_at	4.23	3.07	2.24	4.66e-09	1.34e-06	PROC	protein C (inactivator of coagulation factors Va and VIIIa)
11745349_a_at	4.09	3.13	1.94	5.66e-07	7.2e-05	PROC	protein C (inactivator of coagulation factors Va and VIIIa)
11737798_a_at	4.58	3.27	2.49	0.0002	0.0082	PROCR	protein C receptor, endothelial
11754354_s_at	3.83	2.88	1.92	0.001	0.0282	PROM1	prominin 1
11739889_at	6.64	5.66	1.97	5.94e-05	0.0033	PRSS12	protease, serine, 12 (neurotrypsin, motopsin)
11739890_at	6.77	6.16	1.52	0.0002	0.0101	PRSS12	protease, serine, 12 (neurotrypsin, motopsin)
11728883_a_at	5.16	2.59	5.92	1.99e-11	1.35e-08	PRSS35	protease, serine 35
11728882_a_at	6.37	3.74	6.2	2.65e-10	1.21e-07	PRSS35	protease, serine 35
11756182_s_at	3.02	2.2	1.77	0.0007	0.0226	PSAT1	phosphoserine aminotransferase 1
11756587_a_at	4.84	3.59	2.37	1.67e-08	4.04e-06	PTGDS	prostaglandin D2 synthase 21kDa (brain)
11754526_a_at	3.79	3.07	1.65	0.0008	0.0239	PTGES	prostaglandin E synthase
11751818_x_at	3.9	3.31	1.5	0.0003	0.0107	PTGES3	prostaglandin E synthase 3 (cytosolic)
11722208_a_at	6.41	7.76	-2.55	8.79e-12	6.58e-09	PTGS1	prostaglandin-endoperoxide synthase 1 (prostaglandin G/H synthase and cyclooxygenase)
11722209_a_at	5.8	7.1	-2.46	5.08e-08	9.61e-06	PTGS1	prostaglandin-endoperoxide synthase 1 (prostaglandin G/H synthase and cyclooxygenase)
11723961_s_at	5.84	4.77	2.1	3.83e-09	1.14e-06	PTN	pleiotrophin
11753666_x_at	5	3.9	2.15	3.62e-08	7.41e-06	PTN	pleiotrophin
11733230_a_at	6.41	4.18	4.71	3e-09	9.57e-07	PTPRB	protein tyrosine phosphatase, receptor type, B
11733229_a_at	7.95	5.38	5.93	1.74e-07	2.72e-05	PTPRB	protein tyrosine phosphatase, receptor type, B
11762476_at	5.45	3.82	3.1	7.74e-07	9.35e-05	PTPRB	protein tyrosine phosphatase, receptor type, B
11733231_a_at	4.3	3.49	1.75	7.25e-05	0.0039	PTPRB	protein tyrosine phosphatase, receptor type, B
11752095_a_at	2.49	3.1	-1.53	1.92e-05	0.0014	PTPRC	protein tyrosine phosphatase, receptor type, C
11759190_at	5.77	4.86	1.88	6.47e-05	0.0036	PTPRG	protein tyrosine phosphatase, receptor type, G
11756011_a_at	5.04	4.45	1.51	4.33e-05	0.0026	PTPRJ	protein tyrosine phosphatase, receptor type, J
11728787_a_at	5.01	2.35	6.31	3.91e-13	4.83e-10	PTPRR	protein tyrosine phosphatase, receptor type, R
11748647_a_at	3.58	1.7	3.69	3.75e-10	1.62e-07	PTPRR	protein tyrosine phosphatase, receptor type, R
11748648_a_at	3.03	2.02	2.01	0.0001	0.0054	PTPRR	protein tyrosine phosphatase, receptor type, R
11719444_s_at	2.73	1.86	1.82	7.12e-05	0.0039	PTPRZ1	protein tyrosine phosphatase, receptor-type, Z polypeptide 1
11758348_s_at	6.13	5.34	1.73	0.0004	0.0145	PTTG1IP	pituitary tumor-transforming 1 interacting protein
11727318_at	5.04	4.29	1.69	0.0027	0.0564	PURG	purine-rich element binding protein G
11719827_a_at	3.98	3.3	1.6	0.0002	0.0101	QPCT	glutaminyl-peptide cyclotransferase
11719828_x_at	3.54	2.94	1.51	0.0394	0.283	QPCT	glutaminyl-peptide cyclotransferase
11715556_a_at	5.52	4.83	1.61	7.62e-06	0.0006	QSOX1	quiescin Q6 sulfhydryl oxidase 1
11735055_at	1.85	2.5	-1.57	0.0004	0.0144	RAB3C	RAB3C, member RAS oncogene family
11716241_x_at	3.59	2.97	1.54	3.65e-06	0.0003	RAB6A	RAB6A, member RAS oncogene family
11736471_at	4.13	4.98	-1.8	2.15e-05	0.0015	RAB9B	RAB9B, member RAS oncogene family
11759198_at	6.75	7.46	-1.63	0.0001	0.0065	RAB9B	RAB9B, member RAS oncogene family
11759197_at	6.32	7.13	-1.76	0.0024	0.0514	RAB9B	RAB9B, member RAS oncogene family
11759133_at	2.6	1.99	1.53	0.0042	0.0749	RAB40A	RAB40A, member RAS oncogene family
11745618_s_at	3.25	2.59	1.58	0.0053	0.0878	RAB40A; RAB40AL	RAB40A, member RAS oncogene family; RAB40A, member RAS oncogene family-like
11753603_s_at	6.24	5.59	1.56	0.0093	0.1249	RAC1	ras-related C3 botulinum toxin substrate 1 (rho family, small GTP binding protein Rac1)
11729325_a_at	3.27	2.58	1.62	0.0053	0.0881	RAMP2	receptor (G protein-coupled) activity modifying protein 2
11723001_s_at	5.6	4.77	1.78	0.0002	0.0073	RANBP1	RAN binding protein 1
11722768_s_at	7.84	7.14	1.62	5.54e-05	0.0032	RAPGEF5	Rap guanine nucleotide exchange factor 5
11722313_a_at	4.17	3.55	1.54	0.0163	0.1728	RAPGEF6	Rap guanine nucleotide exchange factor 6
11728092_at	3.52	2.88	1.56	0.0024	0.0518	RASIP1	Ras interacting protein 1
11730160_s_at	6.37	5.66	1.64	0.0001	0.0069	RBM20	RNA binding motif protein 20
11717349_a_at	3.81	2.86	1.93	0.0006	0.0193	RBP1	retinol binding protein 1, cellular
11719671_a_at	3.55	1.87	3.19	5.23e-12	4.23e-09	RCAN2	regulator of calcineurin 2
11719627_at	2.32	3.16	-1.79	2.55e-06	0.0003	RDH10	retinol dehydrogenase 10 (all-trans)
11748631_a_at	3.21	2.52	1.61	5.63e-05	0.0032	REEP5	receptor accessory protein 5
11729359_s_at	2.86	2.26	1.51	0.0002	0.0086	RFTN2	raftlin family member 2
11739797_a_at	4.06	4.93	-1.83	1.4e-11	1e-08	RFX2	regulatory factor X, 2 (influences HLA class II expression)
11755653_a_at	3.59	4.38	-1.73	3.21e-08	6.8e-06	RFX2	regulatory factor X, 2 (influences HLA class II expression)
11715757_a_at	7.86	8.97	-2.15	2.59e-10	1.2e-07	RGS2	regulator of G-protein signaling 2
11758050_s_at	6.27	5.44	1.78	1.82e-05	0.0013	RGS3	regulator of G-protein signaling 3
11722164_s_at	10.7	9.86	1.8	0.0018	0.0435	RGS5	regulator of G-protein signaling 5
11722165_a_at	6.77	5.7	2.09	0.0085	0.1178	RGS5	regulator of G-protein signaling 5
11722166_at	8.43	7.4	2.04	0.0117	0.1433	RGS5	regulator of G-protein signaling 5
11757297_s_at	9.11	8.19	1.89	0.0192	0.1904	RGS5	regulator of G-protein signaling 5
11754028_s_at	5.93	5.33	1.51	0.0005	0.0171	RHEB	Ras homolog enriched in brain
11740182_a_at	4.73	3.84	1.86	0.0002	0.0085	RHOJ	ras homolog family member J
11759345_at	4.98	3.93	2.07	0.0016	0.0396	RHOJ	ras homolog family member J
11723061_s_at	5.59	4.9	1.61	6.54e-06	0.0006	RILPL2	Rab interacting lysosomal protein-like 2
11723020_a_at	2.83	2.15	1.61	0.0004	0.0137	RIPK3	receptor-interacting serine-threonine kinase 3
11722617_at	3.55	2.26	2.44	2.43e-08	5.4e-06	RIPK4	receptor-interacting serine-threonine kinase 4
11716222_a_at	7.63	7.02	1.52	0.0007	0.0206	RNASE1	ribonuclease, RNase A family, 1 (pancreatic)
11721202_at	3.35	3.99	-1.55	0.0011	0.0298	RNASE6	ribonuclease, RNase A family, k6
11731082_at	4.03	2.77	2.39	7.02e-06	0.0006	RNF144B	ring finger protein 144B
11755778_a_at	6.87	5.59	2.43	7.26e-05	0.0039	ROBO4	roundabout guidance receptor 4
11755622_x_at	6.73	5.47	2.38	0.0004	0.0135	ROBO4	roundabout guidance receptor 4
11750764_a_at	3.34	2.74	1.52	0.0048	0.0819	ROBO4	roundabout guidance receptor 4
11736818_at	1.92	2.55	-1.55	2.99e-07	4.23e-05	RPE65	retinal pigment epithelium-specific protein 65kDa
11723428_s_at	10.61	10.01	1.52	0.0017	0.0407	RPL13; RPL13P12	ribosomal protein L13; ribosomal protein L13 pseudogene 12
11746188_s_at	9.4	8.78	1.54	0.0003	0.0124	RPL14; RPL14P1	ribosomal protein L14; ribosomal protein L14 pseudogene 1
200022_PM_at	8.8	8.06	1.66	0.0034	0.0652	RPL18	ribosomal protein L18
11744147_x_at	8.77	8.03	1.67	0.0075	0.1093	RPL18	ribosomal protein L18
11715502_x_at	9.35	8.68	1.59	0.0003	0.0119	RPL18A	ribosomal protein L18a
11757374_x_at	9.58	8.9	1.61	0.0006	0.0192	RPL18A	ribosomal protein L18a
11731762_s_at	5.94	4.31	3.09	2.37e-08	5.35e-06	RPS6KA2	ribosomal protein S6 kinase, 90kDa, polypeptide 2
11731763_s_at	4.97	3.99	1.97	2.39e-08	5.36e-06	RPS6KA2	ribosomal protein S6 kinase, 90kDa, polypeptide 2
11735610_a_at	5	3.88	2.18	1.15e-05	0.0009	RPS6KA5	ribosomal protein S6 kinase, 90kDa, polypeptide 5
11723251_at	6.12	5.44	1.6	0.0002	0.0104	RPS15A	ribosomal protein S15a
11724619_at	3.92	2.99	1.91	0.0006	0.0204	RSPO3	R-spondin 3
11756827_a_at	4.89	3.77	2.18	1.6e-06	0.0002	RTN1	reticulon 1
11761923_a_at	4.15	2.78	2.59	2.01e-06	0.0002	RXFP1	relaxin/insulin-like family peptide receptor 1
11726241_at	4.56	5.29	-1.65	2.61e-05	0.0017	RYR3	ryanodine receptor 3
11743816_s_at	4.64	3.04	3.04	3.18e-05	0.002	S1PR1	sphingosine-1-phosphate receptor 1
11752382_a_at	3.64	2.63	2.01	9.27e-05	0.0048	S1PR1	sphingosine-1-phosphate receptor 1
11743815_a_at	3.56	2.6	1.94	0.0003	0.0119	S1PR1	sphingosine-1-phosphate receptor 1
11752664_a_at	5.04	4.01	2.04	5.31e-14	8.74e-11	S1PR5	sphingosine-1-phosphate receptor 5
11723006_a_at	8.26	6.43	3.54	1.7e-13	2.34e-10	S100A4	S100 calcium binding protein A4
11756146_x_at	8.88	7.19	3.23	1.82e-13	2.43e-10	S100A4	S100 calcium binding protein A4
11718064_a_at	8.4	6.58	3.53	7.98e-13	8.76e-10	S100A4	S100 calcium binding protein A4
11716523_at	3.18	4.05	-1.82	0.0036	0.0677	S100A9	S100 calcium binding protein A9
11743113_x_at	7.04	5.65	2.64	9.02e-09	2.45e-06	S100A10	S100 calcium binding protein A10
11743112_at	6.05	4.78	2.4	3.97e-08	8.01e-06	S100A10	S100 calcium binding protein A10
11747298_a_at	4.49	3.17	2.49	2.68e-08	5.85e-06	S100A16	S100 calcium binding protein A16
11743681_at	6.57	5.51	2.08	6.4e-07	7.99e-05	S100A16	S100 calcium binding protein A16
11726174_at	4.04	4.93	-1.86	5.92e-07	7.5e-05	SAMD5	sterile alpha motif domain containing 5
11724118_a_at	3.65	2.75	1.86	1.82e-07	2.83e-05	SAMD9L	sterile alpha motif domain containing 9-like
11724688_a_at	5.67	6.94	-2.41	1.51e-12	1.46e-09	SAMD11	sterile alpha motif domain containing 11
11739149_a_at	3.27	5.37	-4.29	5.71e-18	5.64e-14	SAMHD1	SAM domain and HD domain 1
11749510_a_at	3.63	5.66	-4.09	1.84e-14	3.96e-11	SAMHD1	SAM domain and HD domain 1
11735710_s_at	2.78	3.37	-1.5	0.0036	0.0683	SAMSN1	SAM domain, SH3 domain and nuclear localization signals 1
11745879_a_at	5.53	4.44	2.12	6.25e-07	7.82e-05	SARAF	store-operated calcium entry-associated regulatory factor
11752815_x_at	7.48	6.51	1.97	9.53e-06	0.0008	SARAF	store-operated calcium entry-associated regulatory factor
11722270_at	2.59	3.3	-1.63	4.14e-05	0.0025	SASH3	SAM and SH3 domain containing 3
11743036_s_at	7.85	8.53	-1.6	3.18e-07	4.42e-05	SAT1	spermidine/spermine N1-acetyltransferase 1
11763704_a_at	5.71	6.47	-1.7	0.0006	0.0198	SAT1	spermidine/spermine N1-acetyltransferase 1
11717950_s_at	6.3	5.7	1.52	3.75e-06	0.0004	SC5D	sterol-C5-desaturase
11733780_a_at	3.23	2.55	1.6	0.003	0.0601	SC5D	sterol-C5-desaturase
11756174_s_at	6.54	5.25	2.44	2.87e-09	9.21e-07	SCD	stearoyl-CoA desaturase (delta-9-desaturase)
11725694_at	4.06	4.95	-1.84	0.0002	0.0089	SDPR	serum deprivation response
11753915_a_at	4.99	3.55	2.71	2.7e-07	3.89e-05	SEL1L3	sel-1 suppressor of lin-12-like 3 (C. elegans)
11743915_s_at	3.28	2.34	1.92	4.01e-06	0.0004	SEL1L3	sel-1 suppressor of lin-12-like 3 (C. elegans)
11744948_x_at	4.39	3.66	1.66	0.002	0.0458	SEMA3F	sema domain, immunoglobulin domain (Ig), short basic domain, secreted, (semaphorin) 3F
11720907_x_at	4.32	3.72	1.52	0.0045	0.0783	SEMA3F	sema domain, immunoglobulin domain (Ig), short basic domain, secreted, (semaphorin) 3F
11734887_at	3.42	2.03	2.62	1.21e-10	6.44e-08	SEMA3G	sema domain, immunoglobulin domain (Ig), short basic domain, secreted, (semaphorin) 3G
11719522_at	6.21	4.67	2.89	1.24e-10	6.52e-08	SEMA5A	sema domain, seven thrombospondin repeats (type 1 and type 1-like), transmembrane domain (TM) and short cytoplasmic domain, (semaphorin) 5A
11719521_at	6.28	5.08	2.3	3.24e-08	6.83e-06	SEMA5A	sema domain, seven thrombospondin repeats (type 1 and type 1-like), transmembrane domain (TM) and short cytoplasmic domain, (semaphorin) 5A
11719520_at	5.03	4.29	1.66	5.04e-07	6.49e-05	SEMA5A	sema domain, seven thrombospondin repeats (type 1 and type 1-like), transmembrane domain (TM) and short cytoplasmic domain, (semaphorin) 5A
11717513_a_at	6.79	6.16	1.55	5.39e-05	0.0031	SEPT8	septin 8
11729263_x_at	6.43	5.63	1.74	6.68e-05	0.0037	SERPINB9	serpin peptidase inhibitor, clade B (ovalbumin), member 9
11715636_a_at	5.37	4.52	1.81	9.91e-05	0.005	SERPINE1	serpin peptidase inhibitor, clade E (nexin, plasminogen activator inhibitor type 1), member 1
11741680_a_at	7.36	4.15	9.27	3.12e-14	5.92e-11	SERPINE2	serpin peptidase inhibitor, clade E (nexin, plasminogen activator inhibitor type 1), member 2
11757442_a_at	7.99	4.72	9.64	9.19e-12	6.78e-09	SERPINE2	serpin peptidase inhibitor, clade E (nexin, plasminogen activator inhibitor type 1), member 2
11758598_s_at	9.98	7.99	3.98	8.65e-11	4.91e-08	SERPINE2	serpin peptidase inhibitor, clade E (nexin, plasminogen activator inhibitor type 1), member 2
11757643_x_at	8.24	5.8	5.45	2.44e-10	1.17e-07	SERPINE2	serpin peptidase inhibitor, clade E (nexin, plasminogen activator inhibitor type 1), member 2
11741679_x_at	4.65	3.04	3.05	6.87e-09	1.9e-06	SERPINE2	serpin peptidase inhibitor, clade E (nexin, plasminogen activator inhibitor type 1), member 2
11741678_a_at	3.64	3.03	1.52	0.0056	0.091	SERPINE2	serpin peptidase inhibitor, clade E (nexin, plasminogen activator inhibitor type 1), member 2
11731246_s_at	3.48	2.79	1.61	0.0006	0.0198	SERTAD4	SERTA domain containing 4
11723246_s_at	6.13	4.65	2.79	5.81e-06	0.0005	SFRP1	secreted frizzled-related protein 1
11723245_a_at	3.71	2.96	1.68	0.0066	0.1007	SFRP1	secreted frizzled-related protein 1
11752474_a_at	1.91	2.64	-1.66	0.0003	0.0118	SFRP5	secreted frizzled-related protein 5
11751975_a_at	4.2	3.13	2.09	1.79e-08	4.23e-06	SGIP1	SH3-domain GRB2-like (endophilin) interacting protein 1
11755146_a_at	4.69	3.53	2.22	1.41e-07	2.28e-05	SGIP1	SH3-domain GRB2-like (endophilin) interacting protein 1
11718447_s_at	2.67	2.07	1.52	8.61e-06	0.0007	SH3BGRL2	SH3 domain binding glutamate-rich protein like 2
11718448_at	4.87	3.92	1.94	2.76e-05	0.0018	SH3BGRL2	SH3 domain binding glutamate-rich protein like 2
11724312_a_at	4.55	3.91	1.56	6.75e-05	0.0037	SH3BP2	SH3-domain binding protein 2
11754466_a_at	6.99	6.05	1.92	7.37e-06	0.0006	SH3BP4	SH3-domain binding protein 4
11758651_s_at	4.99	5.82	-1.77	3.28e-05	0.0021	SH3GL3	SH3-domain GRB2-like 3
11758507_s_at	3.83	3.22	1.53	0.0026	0.0545	SHC4	SHC (Src homology 2 domain containing) family, member 4
11754401_a_at	3.62	2.95	1.58	0.0011	0.0305	SHE	Src homology 2 domain containing E
11726188_at	3.29	1.72	2.97	4.31e-09	1.26e-06	SHISA3	shisa family member 3
11750992_x_at	4.31	3.42	1.86	2.1e-07	3.19e-05	SHMT2	serine hydroxymethyltransferase 2 (mitochondrial)
11756615_x_at	4.48	3.54	1.93	4.1e-07	5.48e-05	SHMT2	serine hydroxymethyltransferase 2 (mitochondrial)
11747537_x_at	4.34	3.56	1.72	3.53e-05	0.0022	SHMT2	serine hydroxymethyltransferase 2 (mitochondrial)
11746438_a_at	3.28	2.44	1.79	3.97e-05	0.0024	SHMT2	serine hydroxymethyltransferase 2 (mitochondrial)
11727273_a_at	4.84	3.78	2.08	4.7e-06	0.0004	SHROOM2	shroom family member 2
11740387_at	4.44	2.98	2.75	1.09e-07	1.89e-05	SHROOM4	shroom family member 4
11740386_x_at	3.04	2.4	1.56	2.67e-05	0.0018	SHROOM4	shroom family member 4
11746924_x_at	2.79	2.05	1.67	0.0006	0.0193	SHROOM4	shroom family member 4
11746556_a_at	4.36	3.75	1.53	0.0036	0.0677	SLBP	stem-loop binding protein
11721352_at	3.62	2.86	1.7	2.88e-05	0.0019	SLC1A1	solute carrier family 1 (neuronal/epithelial high affinity glutamate transporter, system Xag), member 1
11757680_a_at	5.9	5.27	1.54	0.0003	0.0126	SLC1A4	solute carrier family 1 (glutamate/neutral amino acid transporter), member 4
11752572_a_at	5.33	3.86	2.78	5.38e-10	2.23e-07	SLC2A1	solute carrier family 2 (facilitated glucose transporter), member 1
11756238_s_at	7.73	6.37	2.56	2.4e-09	8.02e-07	SLC2A1	solute carrier family 2 (facilitated glucose transporter), member 1
11740957_x_at	2.55	1.94	1.52	0.0007	0.0212	SLC2A6	solute carrier family 2 (facilitated glucose transporter), member 6
11736556_s_at	6.16	4.3	3.63	2.12e-13	2.75e-10	SLC2A14; SLC2A3	solute carrier family 2 (facilitated glucose transporter), member 14; solute carrier family 2 (facilitated glucose transporter), member 3
11734657_s_at	4.86	3.15	3.26	3.17e-13	4.01e-10	SLC2A14; SLC2A3	solute carrier family 2 (facilitated glucose transporter), member 14; solute carrier family 2 (facilitated glucose transporter), member 3
11747751_s_at	3.67	2.72	1.93	3.28e-12	2.7e-09	SLC2A14; SLC2A3	solute carrier family 2 (facilitated glucose transporter), member 14; solute carrier family 2 (facilitated glucose transporter), member 3
11736555_s_at	6.87	4.5	5.17	6.29e-12	5.01e-09	SLC2A14; SLC2A3	solute carrier family 2 (facilitated glucose transporter), member 14; solute carrier family 2 (facilitated glucose transporter), member 3
11752739_s_at	3.46	2.5	1.95	1.23e-07	2.07e-05	SLC2A14; SLC2A3	solute carrier family 2 (facilitated glucose transporter), member 14; solute carrier family 2 (facilitated glucose transporter), member 3
11723862_at	6.98	4.93	4.14	3.52e-14	6.44e-11	SLC6A1	solute carrier family 6 (neurotransmitter transporter), member 1
11721993_at	7.04	5.21	3.57	6.79e-08	1.24e-05	SLC6A6	solute carrier family 6 (neurotransmitter transporter), member 6
11716740_a_at	5.18	4.26	1.89	7.02e-12	5.42e-09	SLC6A8	solute carrier family 6 (neurotransmitter transporter), member 8
11736030_a_at	5.58	4.58	1.99	1.13e-08	3.01e-06	SLC16A3	solute carrier family 16 (monocarboxylate transporter), member 3
11743960_a_at	7.34	6.64	1.62	9.28e-06	0.0008	SLC16A3	solute carrier family 16 (monocarboxylate transporter), member 3
11757626_x_at	2.81	2.21	1.51	0.0002	0.0099	SLC16A4	solute carrier family 16, member 4
11725662_a_at	2.96	2.21	1.68	0.0006	0.0199	SLC16A14	solute carrier family 16, member 14
11724454_at	3.22	2.42	1.74	7.69e-05	0.0041	SLC22A4	solute carrier family 22 (organic cation/zwitterion transporter), member 4
11729585_x_at	7.21	6.62	1.5	0.0133	0.1546	SLC25A6	solute carrier family 25 (mitochondrial carrier; adenine nucleotide translocator), member 6
11729584_a_at	8.05	7.43	1.54	0.0166	0.1748	SLC25A6	solute carrier family 25 (mitochondrial carrier; adenine nucleotide translocator), member 6
11729078_a_at	1.7	2.29	-1.51	0.0008	0.0242	SLC26A7	solute carrier family 26 (anion exchanger), member 7
11717162_a_at	4.81	3.91	1.87	1.3e-07	2.17e-05	SLC29A1	solute carrier family 29 (equilibrative nucleoside transporter), member 1
11758136_s_at	3.27	2.35	1.89	1.97e-08	4.58e-06	SLC35G2	solute carrier family 35, member G2
11743091_x_at	5.23	5.86	-1.55	0.036	0.2693	SLC36A4	solute carrier family 36 (proton/amino acid symporter), member 4
11715789_a_at	4.27	4.93	-1.57	1.32e-07	2.2e-05	SLC40A1	solute carrier family 40 (iron-regulated transporter), member 1
11715788_a_at	5.07	5.77	-1.63	0.0032	0.0629	SLC40A1	solute carrier family 40 (iron-regulated transporter), member 1
11716847_a_at	4.83	4.22	1.52	2.15e-06	0.0002	SLC43A3	solute carrier family 43, member 3
11756511_a_at	4.97	3.66	2.49	4.55e-05	0.0027	SLCO2A1	solute carrier organic anion transporter family, member 2A1
11717560_at	7.09	5.81	2.42	0.0024	0.0517	SLCO2A1	solute carrier organic anion transporter family, member 2A1
11758259_s_at	3.51	4.29	-1.71	0.0004	0.0135	SLCO2B1	solute carrier organic anion transporter family, member 2B1
11741567_x_at	4.97	5.59	-1.54	0.011	0.1373	SLCO2B1	solute carrier organic anion transporter family, member 2B1
11754796_a_at	3.38	2.58	1.74	7.96e-10	2.98e-07	SLCO3A1	solute carrier organic anion transporter family, member 3A1
11758172_s_at	3.6	2.75	1.8	2.04e-06	0.0002	SLCO3A1	solute carrier organic anion transporter family, member 3A1
11727067_a_at	6.18	5.58	1.52	0.0003	0.0128	SLIT3	slit guidance ligand 3
11761874_at	8.77	9.55	-1.71	4.41e-10	1.89e-07	SLMAP	sarcolemma associated protein
11752770_a_at	4.66	4.03	1.56	0.0187	0.1872	SMARCE1	SWI/SNF related, matrix associated, actin dependent regulator of chromatin, subfamily e, member 1
11724352_a_at	6.03	5.23	1.74	1.01e-05	0.0008	SMC6	structural maintenance of chromosomes 6
11724351_a_at	5.06	4.42	1.55	1.3e-05	0.001	SMC6	structural maintenance of chromosomes 6
11717937_at	4.68	3.76	1.89	9.67e-09	2.6e-06	SMIM3	small integral membrane protein 3
11744218_at	6.85	6.19	1.58	2.24e-05	0.0015	SNAI2	snail family zinc finger 2
11719046_a_at	7.67	7.01	1.58	0.0005	0.0167	SNRK	SNF related kinase
11754105_x_at	5.14	4.39	1.68	0.0043	0.0761	SNRPB	small nuclear ribonucleoprotein polypeptides B and B1
11736675_a_at	5.95	5.11	1.79	0.0106	0.1347	SNRPB	small nuclear ribonucleoprotein polypeptides B and B1
11757964_s_at	4.57	3.95	1.54	0.0001	0.0058	SNTB1	syntrophin, beta 1 (dystrophin-associated protein A1, 59kDa, basic component 1)
11738121_a_at	5.31	4.61	1.63	0.0014	0.035	SNX18	sorting nexin 18
11752487_a_at	4.27	3.53	1.67	6.08e-05	0.0034	SNX25	sorting nexin 25
11743129_at	3.4	4.07	-1.59	0.0009	0.0251	SORL1	sortilin-related receptor, L(DLR class) A repeats containing
11720993_at	1.5	2.16	-1.59	3.72e-05	0.0023	SOX2	SRY box 2
11719560_at	6.39	5.78	1.53	2.75e-05	0.0018	SOX4	SRY box 4
11757741_s_at	6.92	6.23	1.62	0.0001	0.0056	SOX4	SRY box 4
11719563_a_at	5.93	5.31	1.54	0.0006	0.0196	SOX4	SRY box 4
11724709_s_at	4.5	3.26	2.35	7.92e-10	2.98e-07	SOX11	SRY box 11
11758618_s_at	3.74	2.8	1.92	8.45e-08	1.49e-05	SOX11	SRY box 11
11743874_a_at	2.56	1.7	1.82	2.65e-09	8.65e-07	SOX17	SRY box 17
11720832_x_at	4.63	3.53	2.15	7.53e-06	0.0006	SOX18	SRY box 18
11754058_a_at	6.35	5.7	1.56	0.0012	0.0323	SPARC	secreted protein, acidic, cysteine-rich (osteonectin)
11754059_x_at	7.53	6.78	1.68	0.0015	0.0368	SPARC	secreted protein, acidic, cysteine-rich (osteonectin)
11719222_at	4.12	2.49	3.09	8.69e-13	9.33e-10	SPINK1	serine peptidase inhibitor, Kazal type 1
11745496_a_at	5.97	4.7	2.42	2.62e-10	1.21e-07	SPINT2	serine peptidase inhibitor, Kunitz type, 2
11742851_x_at	3.78	2.74	2.06	1.72e-08	4.14e-06	SPINT2	serine peptidase inhibitor, Kunitz type, 2
11720051_at	9.31	6.81	5.67	2.23e-08	5.07e-06	SPOCK1	sparc/osteonectin, cwcv and kazal-like domains proteoglycan (testican) 1
11755730_x_at	6.58	5.8	1.72	0.0184	0.1855	SPP1	secreted phosphoprotein 1
11737944_x_at	6.55	5.95	1.52	0.0453	0.3031	SPP1	secreted phosphoprotein 1
11717651_a_at	5.42	4.76	1.58	0.0005	0.0172	SPRY1	sprouty RTK signaling antagonist 1
11750969_a_at	4.85	4.09	1.69	0.0008	0.0242	SQLE	squalene epoxidase
11739521_at	2.86	3.52	-1.57	0.0342	0.2627	ST8SIA4	ST8 alpha-N-acetyl-neuraminide alpha-2,8-sialyltransferase 4
11721437_a_at	4.95	3.07	3.68	2.38e-16	9.79e-13	STC2	stanniocalcin 2
11721435_at	5.1	3.44	3.15	2.89e-16	1.1e-12	STC2	stanniocalcin 2
11721436_a_at	6.24	4.05	4.58	4.68e-13	5.5e-10	STC2	stanniocalcin 2
11727390_a_at	3.06	2.34	1.65	9.59e-05	0.0049	STEAP2	STEAP family member 2, metalloreductase
11742423_a_at	3.46	2.69	1.7	0.0006	0.0195	STEAP2	STEAP family member 2, metalloreductase
11753704_a_at	4.69	3.55	2.2	1.4e-05	0.001	STMN1	stathmin 1
11719666_a_at	6.17	4.98	2.29	1.82e-05	0.0013	STMN1	stathmin 1
11753705_x_at	5.51	4.22	2.44	7.05e-05	0.0038	STMN1	stathmin 1
11719667_s_at	8.52	7.64	1.84	0.0001	0.0065	STMN1	stathmin 1
11749061_x_at	5.71	5.06	1.58	0.0025	0.0535	STOM	stomatin
11754151_a_at	5.29	5.95	-1.58	3.71e-07	5.04e-05	STXBP5	syntaxin binding protein 5 (tomosyn)
11723151_s_at	7.77	7.11	1.58	0.0005	0.0174	SUGCT	succinyl-CoA:glutarate-CoA transferase
11758071_s_at	10.54	9.34	2.3	0.0002	0.0091	SULF1	sulfatase 1
11737874_a_at	9.65	8.21	2.71	0.0004	0.0138	SULF1	sulfatase 1
11743282_a_at	8.48	6.97	2.84	0.0006	0.0189	SULF1	sulfatase 1
11740238_a_at	7.67	8.42	-1.68	1.2e-05	0.0009	SULF2	sulfatase 2
11721493_a_at	6.93	7.55	-1.54	0.0208	0.2001	SULF2	sulfatase 2
11724155_at	5.93	4.09	3.6	7.02e-10	2.72e-07	SULT1E1	sulfotransferase family 1E member 1
11724157_x_at	7.18	5.54	3.13	6.56e-09	1.82e-06	SULT1E1	sulfotransferase family 1E member 1
11724156_at	7.13	5.35	3.42	7.6e-08	1.37e-05	SULT1E1	sulfotransferase family 1E member 1
11724154_a_at	2.82	1.86	1.94	3.79e-05	0.0023	SULT1E1	sulfotransferase family 1E member 1
11759039_at	4.73	4.07	1.59	4.15e-05	0.0025	SVIP	small VCP/p97-interacting protein
11739458_at	5.33	6.21	-1.83	0.0019	0.0446	SYNC	syncoilin, intermediate filament protein
11728304_at	2.68	3.3	-1.54	1.28e-05	0.001	SYNDIG1	synapse differentiation inducing 1
11721602_a_at	8.83	9.64	-1.75	1.25e-05	0.001	SYNPO2	synaptopodin 2
11730122_at	2.51	1.84	1.59	0.0056	0.0912	TACR1	tachykinin receptor 1
11754071_x_at	4.87	4.2	1.58	0.0024	0.0517	TAGLN2	transgelin 2
11725898_s_at	4.98	4.05	1.91	0.0002	0.01	TAL1	T-cell acute lymphocytic leukemia 1
11753071_a_at	3.81	4.52	-1.63	0.0001	0.0063	TASP1	taspase 1
11725090_at	5.45	6.31	-1.81	0.0054	0.0885	TASP1	taspase 1
11756928_x_at	6.29	5.54	1.69	0.0011	0.0299	TBCD	tubulin folding cofactor D
11730262_a_at	6.65	5.95	1.62	0.004	0.0733	TBCD	tubulin folding cofactor D
11732881_s_at	3.48	2.2	2.42	2.76e-05	0.0018	TBX1	T-box 1
11721140_a_at	4.21	3.57	1.55	7e-05	0.0038	TCEA3	transcription elongation factor A (SII), 3
11725443_at	4.02	3.22	1.75	1.65e-05	0.0012	TCEAL7	transcription elongation factor A (SII)-like 7
11740323_at	3	2.35	1.57	6.36e-05	0.0035	TCTEX1D1	Tctex1 domain containing 1
11724304_a_at	3.92	3.27	1.56	2.37e-05	0.0016	TEF	thyrotrophic embryonic factor
11748375_a_at	5.87	4.35	2.88	9.48e-07	0.0001	TEK	TEK tyrosine kinase, endothelial
11727406_a_at	7.11	5.7	2.66	1.86e-05	0.0013	TEK	TEK tyrosine kinase, endothelial
11743697_a_at	4.42	5.02	-1.52	0.0003	0.0107	TEX30	testis expressed 30
11731183_a_at	6.38	5.69	1.61	0.0062	0.0971	TFPI	tissue factor pathway inhibitor (lipoprotein-associated coagulation inhibitor)
11757793_s_at	8	7.32	1.6	0.0081	0.115	TFPI	tissue factor pathway inhibitor (lipoprotein-associated coagulation inhibitor)
11723951_a_at	6.63	5.99	1.56	0.0131	0.1531	TFPI	tissue factor pathway inhibitor (lipoprotein-associated coagulation inhibitor)
11755281_a_at	8.1	7.35	1.68	4.84e-05	0.0028	TGFBI	transforming growth factor, beta-induced, 68kDa
11718901_at	6.37	7.04	-1.59	1.38e-05	0.001	TGFBR3	transforming growth factor beta receptor III
11718900_a_at	6.43	7.11	-1.6	2.15e-05	0.0015	TGFBR3	transforming growth factor beta receptor III
11755219_a_at	4.96	3.93	2.05	0.0101	0.1313	THBD	thrombomodulin
11742712_a_at	4.84	3.46	2.6	8.06e-06	0.0007	THBS2	thrombospondin 2
11742711_at	8.2	7.13	2.11	1.61e-05	0.0012	THBS2	thrombospondin 2
11757941_s_at	8.88	8.13	1.68	3.97e-05	0.0024	THBS2	thrombospondin 2
11721615_a_at	3.77	4.45	-1.6	3.19e-06	0.0003	THEMIS2	thymocyte selection associated family member 2
11754833_a_at	4.11	4.71	-1.52	0.0005	0.0175	TLR2	toll-like receptor 2
11753129_a_at	5.06	3.54	2.87	0.0002	0.0103	TM4SF1	transmembrane 4 L six family member 1
11753131_x_at	5.75	4.26	2.8	0.0009	0.0267	TM4SF1	transmembrane 4 L six family member 1
11753130_at	6.31	5.14	2.25	0.0013	0.0345	TM4SF1	transmembrane 4 L six family member 1
11728885_x_at	5	3.69	2.48	2.78e-06	0.0003	TM6SF1	transmembrane 6 superfamily member 1
11728884_a_at	4.33	3.72	1.52	0.001	0.0283	TM6SF1	transmembrane 6 superfamily member 1
11747146_s_at	4.26	3.42	1.79	5.62e-05	0.0032	TMBIM6	transmembrane BAX inhibitor motif containing 6
11754104_x_at	5.12	4.27	1.8	1.21e-05	0.0009	TMED3	transmembrane p24 trafficking protein 3
11754102_a_at	5.18	4.3	1.83	0.0002	0.0095	TMED3	transmembrane p24 trafficking protein 3
11724642_at	4.05	3.37	1.61	1.99e-05	0.0014	TMEM88	transmembrane protein 88
11757310_s_at	6.04	5.19	1.8	3.45e-05	0.0022	TMEM98	transmembrane protein 98
11741049_s_at	3.02	2.28	1.67	2.12e-06	0.0002	TMEM100	transmembrane protein 100
11726787_s_at	3.44	2.51	1.92	4.17e-05	0.0025	TMEM100	transmembrane protein 100
11754564_x_at	4.64	3.89	1.68	0.0005	0.0163	TMEM130	transmembrane protein 130
11759123_at	3.69	4.49	-1.75	4.62e-06	0.0004	TMEM150C	transmembrane protein 150C
11759336_at	3.04	2.05	1.98	3.87e-08	7.83e-06	TMEM200C	transmembrane protein 200C
11724739_s_at	4.34	3.75	1.5	0.0003	0.0129	TMEM204	transmembrane protein 204
11719419_a_at	5.13	4.44	1.62	0.0003	0.0129	TMEM251	transmembrane protein 251
11720240_at	3.43	2.58	1.8	0.0005	0.0182	TMSB15A	thymosin beta 15a
11718651_at	4.7	4.11	1.51	0.0003	0.0132	TMTC1	transmembrane and tetratricopeptide repeat containing 1
11729777_at	3.99	2.64	2.54	1.24e-08	3.22e-06	TMTC2	transmembrane and tetratricopeptide repeat containing 2
11716062_a_at	4.55	5.95	-2.63	0.0038	0.0706	TNC	tenascin C
11716063_at	6.69	7.97	-2.43	0.0105	0.1338	TNC	tenascin C
11747935_a_at	5.02	6.1	-2.11	0.0155	0.168	TNC	tenascin C
11743636_at	3.73	2.58	2.22	2.2e-07	3.3e-05	TNFAIP6	tumor necrosis factor, alpha-induced protein 6
11732012_x_at	3.62	4.27	-1.58	0.0004	0.014	TNFAIP8L3	tumor necrosis factor, alpha-induced protein 8-like 3
11719680_x_at	5.93	4.66	2.41	3.7e-05	0.0023	TNFRSF10B	tumor necrosis factor receptor superfamily, member 10b
11723310_at	4.95	3.68	2.42	1.7e-05	0.0012	TNFRSF10D	tumor necrosis factor receptor superfamily, member 10d, decoy with truncated death domain
11730319_at	6.66	7.35	-1.61	0.0014	0.0366	TNFRSF11B	tumor necrosis factor receptor superfamily, member 11b
11721736_s_at	2.7	4.84	-4.4	8.45e-15	1.9e-11	TNFRSF19	tumor necrosis factor receptor superfamily, member 19
11721737_a_at	2.13	3.02	-1.85	2.63e-07	3.81e-05	TNFRSF19	tumor necrosis factor receptor superfamily, member 19
11743730_at	4.08	2.86	2.34	9.06e-05	0.0047	TNFSF10	tumor necrosis factor (ligand) superfamily, member 10
11743731_a_at	3.63	2.71	1.89	0.0005	0.0174	TNFSF10	tumor necrosis factor (ligand) superfamily, member 10
11747952_x_at	5.12	3.75	2.58	0.0026	0.0546	TNFSF10	tumor necrosis factor (ligand) superfamily, member 10
11748022_x_at	4.62	2.67	3.88	1.03e-17	8.49e-14	TNNT3	troponin T type 3 (skeletal, fast)
11723967_a_at	7.89	5.7	4.55	2.18e-17	1.54e-13	TNNT3	troponin T type 3 (skeletal, fast)
11746922_x_at	6.55	4.59	3.91	4.96e-17	3.06e-13	TNNT3	troponin T type 3 (skeletal, fast)
11754866_x_at	5.6	3.79	3.52	2.45e-15	6.37e-12	TNNT3	troponin T type 3 (skeletal, fast)
11755643_a_at	8.7	8.09	1.53	1.89e-08	4.41e-06	TNS3	tensin 3
11720970_at	4.32	3.18	2.2	1.9e-06	0.0002	TOP2A	topoisomerase (DNA) II alpha
11740242_s_at	2.39	1.79	1.52	1.26e-05	0.001	TOX	thymocyte selection-associated high mobility group box
11723612_a_at	2.92	2.15	1.7	1.34e-07	2.21e-05	TOX2	TOX high mobility group box family member 2
11720704_s_at	7.9	8.64	-1.67	2.22e-07	3.31e-05	TPD52L1	tumor protein D52-like 1
11721975_s_at	3.07	4.5	-2.7	1.67e-07	2.63e-05	TPSAB1; TPSB2	tryptase alpha/beta 1; tryptase beta 2 (gene/pseudogene)
11750598_s_at	3.26	2.53	1.65	1.86e-05	0.0013	TPX2	TPX2, microtubule-associated
11749141_a_at	5.68	6.27	-1.51	0.0005	0.018	TRAF5	TNF receptor-associated factor 5
11723803_a_at	3.18	3.93	-1.69	0.0002	0.008	TREM2	triggering receptor expressed on myeloid cells 2
11716048_at	5.55	6.62	-2.1	2.51e-10	1.19e-07	TRIB1	tribbles pseudokinase 1
11726903_at	2.74	3.51	-1.71	5.29e-05	0.003	TRIL	TLR4 interactor with leucine-rich repeats
11722369_x_at	4.22	3.29	1.9	0.0008	0.0244	TRIM22	tripartite motif containing 22
11720032_a_at	3.91	4.75	-1.79	0.0062	0.0968	TRIM29	tripartite motif containing 29
11736582_a_at	4.16	2.43	3.31	9.79e-11	5.43e-08	TRIM36	tripartite motif containing 36
11726237_at	3.1	2.17	1.9	1.96e-09	6.76e-07	TRIM36	tripartite motif containing 36
11731961_s_at	3.18	2.34	1.78	9.28e-07	0.0001	TRIM36	tripartite motif containing 36
11728826_s_at	5.67	4.96	1.63	2.48e-07	3.64e-05	TRNP1	TMF1-regulated nuclear protein 1
11728825_at	3.71	2.92	1.73	8.87e-07	0.0001	TRNP1	TMF1-regulated nuclear protein 1
11737164_s_at	2.23	3.21	-1.98	3.5e-08	7.27e-06	TRPC3	transient receptor potential cation channel, subfamily C, member 3
11731336_x_at	4.24	5.03	-1.72	6.71e-05	0.0037	TRPV1	transient receptor potential cation channel, subfamily V, member 1
11757953_x_at	4.66	5.25	-1.5	0.0027	0.0566	TTC39C	tetratricopeptide repeat domain 39C
11727666_at	3.78	2.74	2.05	3.63e-06	0.0003	TWIST1	twist family bHLH transcription factor 1
11730756_at	4.69	3.97	1.64	0.0006	0.0197	TXNDC12	thioredoxin domain containing 12 (endoplasmic reticulum)
11730755_a_at	4.62	3.94	1.59	0.0052	0.0867	TXNDC12	thioredoxin domain containing 12 (endoplasmic reticulum)
11744999_a_at	4.19	2.89	2.46	2.57e-08	5.67e-06	TXNRD2	thioredoxin reductase 2
11718686_x_at	4.27	3.41	1.81	4.4e-08	8.69e-06	TXNRD2	thioredoxin reductase 2
11718685_a_at	4	3.01	1.98	1.1e-07	1.89e-05	TXNRD2	thioredoxin reductase 2
11745000_x_at	4.12	3.16	1.94	3.12e-07	4.38e-05	TXNRD2	thioredoxin reductase 2
11718058_a_at	4.87	3.95	1.89	5.09e-05	0.003	TYMS	thymidylate synthetase
11757635_a_at	5.18	5.98	-1.74	0.0003	0.0107	TYROBP	TYRO protein tyrosine kinase binding protein
11723287_at	4.3	4.98	-1.6	0.0025	0.054	TYROBP	TYRO protein tyrosine kinase binding protein
11729318_s_at	4.36	3.18	2.26	1.23e-07	2.07e-05	UACA	uveal autoantigen with coiled-coil domains and ankyrin repeats
11763843_a_at	6.27	5.33	1.91	2.45e-05	0.0017	UACA	uveal autoantigen with coiled-coil domains and ankyrin repeats
11733252_a_at	6.24	5.34	1.87	0.0001	0.0065	UACA	uveal autoantigen with coiled-coil domains and ankyrin repeats
11733696_x_at	3.59	2.93	1.58	6.65e-05	0.0037	UBE2C	ubiquitin-conjugating enzyme E2C
11733695_a_at	3.07	2.33	1.67	0.0003	0.0116	UBE2C	ubiquitin-conjugating enzyme E2C
11719281_a_at	4.82	4.23	1.51	0.0004	0.0141	UBE2I	ubiquitin conjugating enzyme E2I
11747664_a_at	3.86	3.15	1.63	0.0003	0.0119	UBXN8	UBX domain protein 8
11754461_s_at	2.82	3.71	-1.84	0.0339	0.2613	UCP2	uncoupling protein 2 (mitochondrial, proton carrier)
11739557_a_at	5.47	4.51	1.94	2.48e-08	5.49e-06	VAMP5	vesicle associated membrane protein 5
11724649_at	4.44	3.84	1.52	9.71e-05	0.0049	VANGL1	VANGL planar cell polarity protein 1
11721740_at	3.98	2.55	2.7	5.69e-10	2.34e-07	VANGL2	VANGL planar cell polarity protein 2
11759616_at	4.23	3.62	1.52	0.0021	0.0473	VASH1	vasohibin 1
11757313_s_at	5.38	4.78	1.51	0.0004	0.0147	VAT1	vesicle amine transport 1
11719675_a_at	3.6	2.43	2.24	1.28e-05	0.001	VCAM1	vascular cell adhesion molecule 1
11757425_s_at	6.18	5.26	1.88	0.0003	0.0117	VCAM1	vascular cell adhesion molecule 1
11742208_a_at	6.85	5.92	1.91	0.0005	0.0174	VCAN	versican
11748164_a_at	8.22	7.18	2.05	0.0022	0.0486	VCAN	versican
11748311_s_at	6.21	5.32	1.85	0.0038	0.071	VCAN	versican
11725372_x_at	8.99	8.33	1.59	3.59e-09	1.09e-06	VEGFA	vascular endothelial growth factor A
11741964_s_at	7.18	6.18	2	8.25e-08	1.46e-05	VEGFA	vascular endothelial growth factor A
11725370_s_at	4.96	4.34	1.53	1.85e-07	2.87e-05	VEGFA	vascular endothelial growth factor A
11731163_at	3.5	2.91	1.5	0.0156	0.1685	VIPR2	vasoactive intestinal peptide receptor 2
11754920_s_at	6.91	6.19	1.65	5.96e-05	0.0033	VOPP1	vesicular, overexpressed in cancer, prosurvival protein 1
11731730_a_at	5.63	6.22	-1.51	2.73e-07	3.91e-05	VPS13A	vacuolar protein sorting 13 homolog A (S. cerevisiae)
11740692_a_at	7.72	8.42	-1.61	8.83e-06	0.0007	VPS13A	vacuolar protein sorting 13 homolog A (S. cerevisiae)
11735399_at	3.16	4.1	-1.92	1.6e-05	0.0012	VPS13A	vacuolar protein sorting 13 homolog A (S. cerevisiae)
11724540_a_at	8.29	6.96	2.51	0.0081	0.1144	VWF	von Willebrand factor
11724541_s_at	10.14	9.11	2.05	0.0098	0.1287	VWF	von Willebrand factor
11734561_a_at	4.21	4.89	-1.61	0.0003	0.0116	WBSCR17	Williams-Beuren syndrome chromosome region 17
11744513_a_at	3.87	4.68	-1.74	0.0002	0.0084	WFDC2	WAP four-disulfide core domain 2
11717917_a_at	2.21	2.96	-1.68	0.0033	0.0638	WFDC2	WAP four-disulfide core domain 2
11764247_s_at	6.65	5.52	2.18	1.23e-08	3.19e-06	WISP1	WNT1 inducible signaling pathway protein 1
11735059_a_at	5.11	4.02	2.14	4.46e-06	0.0004	WISP2	WNT1 inducible signaling pathway protein 2
11718761_a_at	5.01	4.35	1.58	8.18e-06	0.0007	WLS	wntless Wnt ligand secretion mediator
11758310_s_at	3.81	3.21	1.52	0.0009	0.0256	WSB2	WD repeat and SOCS box containing 2
11749370_x_at	3.83	3.21	1.54	0.0002	0.0085	XAF1	XIAP associated factor 1
11725043_a_at	6.04	5.45	1.5	0.0268	0.2313	YWHAB	tyrosine 3-monooxygenase/tryptophan 5-monooxygenase activation protein, beta
11721601_s_at	4.73	4.1	1.54	0.0005	0.0175	ZBTB18	zinc finger and BTB domain containing 18
11717367_at	6.84	6.25	1.51	0.0006	0.0191	ZC3HAV1	zinc finger CCCH-type, antiviral 1
11715691_s_at	8.51	9.17	-1.58	1.31e-05	0.001	ZFP36	ZFP36 ring finger protein
11731263_a_at	4.22	2.32	3.73	2.31e-09	7.78e-07	ZNF365	zinc finger protein 365
11739572_x_at	3.93	3.28	1.58	5.11e-06	0.0005	ZNF532	zinc finger protein 532
11759097_a_at	5.9	4.91	1.99	1.76e-09	6.16e-07	ZNF703	zinc finger protein 703
